# Supplementary material for: Comparative Exoproteome Analysis of Streptococcus suis Human Isolates
Source: MDPI journal article supplement (doi:10.3390/microorganisms9061287), 2021-06-12
Supplement: s1 [file s1]

**Supplementary Dataset 2.** Comparison of sequence coverage of predicted cell wall proteins that were identified in this study with that previously published for “surfomic” analysis (Prados de la Torre et al, Vaccines 2020, 8(2):188. doi: 10.3390/vaccines8020188). For such a comparison, peptides found in both proteomics datasets were mapped on the sequences of cell wall proteins. For each protein sequence, those highlighted in yellow represent the peptides found in the exoproteomes; those represented in green, the peptides found in the “surfomes”.

### A0A0H3MXC9-Exoproteome

```
>tr|A0A0H3MXC9|A0A0H3MXC9_STRS4 Putative surface-anchored protein
OS=Streptococcus suis (strain BM407) OX=568814 GN=SSUBM407_0180 PE=4
SV=1
METANKKFRYSIRKFKVGVGSVLIATCLLGAGVSTPTAFATTETSTATQVEAMAKVEEVQ
KLVKELEKELGELDKVPSYGDAQDYSYQKALWEEFLRIGKDNMDYASKMKADDKFFHKVK
GDLNDFKYQIKVENYIRQVAELRKKYPGDNTIEEEYNAHLKQDEGKSIASQEGATLRDYV
DREASEAMGRIKQRVAELEKSKQPQPSPADEPAPAPKEEDTPAPTPKVEDETQEPKTEEK
APETKEETPTPTPKKEGIPAPKEDEVPAPEEETPAPKEEDTPAPDAAPAPAPTPEVDPA
PTPIPDTPKAEKEEAPTVPDTPAPKEDEVPAPIPDAPTTPKVEEETQEPKTEEKAPETKEE
TPTPAPDAEPAPTVPDTPAPDTPAPKEDEVPAPEEETPAPKEEDTPAPDAAPAPAPTPEVDPA
PKTDKVESDKQMPEAKQPEMEQPKAEDMPKEEMPKSEQPKAEDSAPKTAVPEVAPKTAEK
PKLDFTTKERKVEEALPIKEEIRYDASLPLGKSYLLQEGKAGKKVSVYQDVIVDGKVVAT
NLLSETVVEGQNRILVKGSLEMKKKEEVKTTPSVQSNPTLSHKGAPSANKATLPATGEQRN
NLALVGLGLAGISLAVVATAINKKSKDQI
```

### A0A0H3MXC9-Surfome

```
>tr|A0A0H3MXC9|A0A0H3MXC9_STRS4 Putative surface-anchored protein
OS=Streptococcus suis (strain BM407) OX=568814 GN=SSUBM407_0180 PE=4
SV=1
METANKKFRYSIRKFKVGVGSVLIATCLLGAGVSTPTAFATTETSTATQVEAMAKVEEVQ
KLVKELEKELGELDKVPSYGDAQDYSYQKALWEEFLRIGKDNMDYASKMKADDKFFHKVK
GDLNDFKYQIKVENYIRQVAELRKKYPGDNTIEEEYNAHLKQDEGKSIASQEGATLRDYV
DREASEAMGRIKQRVAELEKSKQPQPSPADEPAPAPKEEDTPAPTPKVEDETQEPKTEEK
APETKEETPTPTPKKEGIPAPKEDEVPAPEEETPAPKEEDTPAPDAAPAPAPTPEVDPA
PTPIPDTPKAEKEEAPTVPDTPAPKEDEVPAPIPDAPTTPKVEEETQEPKTEEKAPETKEE
TPTPAPDAEPAPTVPDTPAPDTPAPKEDEVPAPEEETPAPKEEDTPAPDAAPAPAPTPEVDPA
PKTDKVESDKQMPEAKQPEMEQPKAEDMPKEEMPKSEQPKAEDSAPKTAVPEVAPKTAEK
PKLDFTTKERKVEEALPIKEEIRYDASLPLGKSYLLQEGKAGKKVSVYQDVIVDGKVVAT
NLLSETVVEGQNRILVKGSLEMKKKEEVKTTPSVQSNPTLSHKGAPSANKATLPATGEQRN
NLALVGLGLAGISLAVVATAINKKSKDQI
```

---

### A0A0H3MTA4-Exoproteome

>tr|A0A0H3MTA4|A0A0H3MTA4\_STRS4 Putative surface-anchored protein  
OS=Streptococcus suis (strain BM407) OX=568814 GN=SSUBM407\_0194 PE=4  
SV=1

MNKKIFLKSAIILLSVTCLINAIKALDSSGVSSSTGEIVNQDRIYNITLKVKTDGVYNDL  
GGNVISENNVLSGISGTKINLKVSTNSGYRFVGYQSFLESGNSTDGLLP IENDSFEISDK  
TGNVTVVAMFEKIPIDETIYFSDEFSTENINNYLLSENLI GKI AVSNGKLN I HAPGVSSI  
KPILSRQIDESS TLGYEIQFSIQQIGEVKQWNTFRVVF KENS DGSVYALEFTGKA VSIKK  
LSSIDAPNQ TGEK YAETGHN LGSEEHRIRLVVRGDTVTVSDNEIPLLSYSSPENWEGATA  
SIVFTPISNRSVSLDDIIIRQTRALRSLLVVSRI DGQEVTDIQPGSIR GNTSQVFVGDSL  
PLEVIEKPGYQFIGFKDEF GNVVDLSTFSVPNDES DLVIYADFQTAEVVNRET KTFYIDS  
IEGNDTNSGESETNAWK TLEQLRKNTLIAGDRVLLKRGSR FVGEDAALTFKGS GLEDAP I  
LISSYGE GELPLLEAQGK IESVIKLYNQEYIT IENLEITNLDPNFSTSFELNSNNRSKI  
LRGVHVIAEDYGVVHDIVLRNMYLHDINGNLNSKWN GGIFFDVYGTTPVKYDGILIENN  
YLERVDRSGIKLVGSTWANQN LKNKNIPLNWYPSTNVVVRGNRIE KAGGDSITVRDTDG  
ALIEYNISADARYQDTGYNAGIWP FQASNTVIQYNESFR THGVQDGGQLDL DHVSNN SVM  
QYNYSHDNEGGFMLIMNWYEQTSP TVRYNISQNDKDKIFELARGGAQGTAIYNN TIFSDS  
KLTGRAGVIDMPSTSGGTGVKDIFLFNNIFYFTDGEKMFVEASDAGKYKDSIHFYNNAYV  
GVEVPDDPKAITEGITLKG VGTGPTENKSMIANAGKFLTGQLDGYRLPENSSLAKLG VSK  
EEAISYFYK KLGVQPTIDFQDNGSLTMSPT EAFALARQ TNSVDAIARVYPAIEGV TYDTD  
FFGETLSS ENLSVGAAQEKKSVFEEKISDIEISDVKTGIGMRYKRSNQLADV NLSIRLIN  
KDELQYTINANNPTFSYEIQ LQKNFGEYMDLSESVTIT IPIEADKKILNVLKINKNEQTE  
SVKELPYRIENNKI ILETDELGSFII EYQMEKIKKENNTNATISESGKSSLGLQNKENS D  
VQAVGDKDYFSGLELSNKGEELSREDSKLMGNSINN LQTIKESESI FEGNLGRNKELSDM  
YQKSLPKTGESNQAYIVLIGLFSLFVVLICQIFKKSID

### A0A0H3MTA4-Surfome

>tr|A0A0H3MTA4|A0A0H3MTA4\_STRS4 Putative surface-anchored protein  
OS=Streptococcus suis (strain BM407) OX=568814 GN=SSUBM407\_0194 PE=4  
SV=1

MNKKIFLKSAIILLSVTCLINAIKALDSSGVSSSTGEIVNQDR IYNITLKVKTDGVYNDL  
CGNVISENNVLSGISGTK INLK VSTNSGYR FVGYQSFLESGNSTDGLLP IENDSFEISDK  
TGNVTVVAMFEKIPIDETIYFSDEFSTENINNYLLSENLI GKI AVSNGK LNIHAPGVSSI  
KPILSRQIDESS TLGYEIQFSIQQIGEVKQWNTFRVVF KENS DGSVYALEFTGKA VSIKK  
LSSIDAPNQ TGEK YAETGHN LGSEEHR IRLVVRGDTVTVSDNEIPLLSYSSPENWEGATA  
SIVFTPISNRSVSLDDIIIRQTRALRS LLVVSRI DGQEVTDIQPGSIR GNTSQVFVGDSL  
PLEVIEKPGYQFIGFKDEF GNVVDLSTFSVPNDES DLVIYADFQTAEVVNRET KTFYIDS  
IEGNDTNSGESETNAWK TLEQLRKNTLIAGDR VLLKRGSRFVGEDAALTFKGS GLEDAP I  
LISSYGE GELPLLEAQGK IESVIKLYNQEYIT IENLEITNLDPNFSTSFELNSNNRSKI  
LRGVHVIAEDYGVVHDIVLRN MYLHDINGNLNSK WNGGIFFDVYGTTPVKYDGILIENN  
YLERVDRSGIKLVGSTWANQN LKNKNIPLNWYPSTNVVVRGNRIE KAGGDSITVRDTDG  
ALIEYNISADARYQDTGYNAGIWP FQASNTVIQYNESFR THGVQDGGQLDL DHVSNN SVM  
QYNYSHDNEGGFMLIMNWYEQTSP TVRYNISQNDKDKIFELARGGAQGTAIYNN TIFSDS  
KLTGRAGVIDMPSTSGGTGVKDIFLFNNIFYFTDGEKMFVEASDAGKYKDSIHFYNNAYV  
GVEVPDDPKAITEGITLKG VGTGPTENKSMIANAGK FLTGQLDGYRLPENSSLAKLG VSK  
EEAISYFYK KLGVQPTIDFQDNGSLTMSPT EAFALARQ TNSVDAIARVYPAIEGV TYDTD  
FFGETLSS ENLSVGAAQEKKSVFEEKISDIEISDVKTGIGMRYKR SNQLADV NLSIRLIN  
KDELQYTINANNPTFSYEIQ LQKNFGEYMDLSESVTIT IPIEADKKILNVLKINKNEQTE  
SVKELPYRIENNKI ILETDELGSFII EYQMEK IKKENNTNATISESGK SSLGLQNKENS D  
VQAVGDKDYFSGLELSNKGEELSREDSK LMGNSINN LQTIKESESI FEGNLGRNKELSDM  
YQKSLPKTGESNQAYIVLIGLFSLFVVLICQIFKKSID

---

### A0A0H3MTC5-Exoproteome

>tr|A0A0H3MTC5|A0A0H3MTC5\_STRS4 Putative surface-anchored protein  
OS=Streptococcus suis (strain BM407) OX=568814 GN=SSUBM407\_0244 PE=4  
SV=1  
MSKQKVVSSLLLSTVVLGGLAFYSTTTVKAESLEPDVTSVNASDATNKPVPNEEGGDFLAELEELEDDDT  
LEELNEKAEVTEPSSPEALLQPRAMMSDSETSGMEEIPMNDEPSDNTEEKVEKQQSPLIQTSNADYKS  
GKDQEKLRTSVSINLLKAEEGQIQWKVTFDTSSEWSFNVKHGGVYFILPNGLDLTKIVDNNQHDITASFPT  
DINDYRNSGQEKYRFFSSKQGLDNENGFN SQWNWSAGQANPSETVNSWKSGNRLSKIYFINQITDTELT  
YTTLAKVTEPNQQSFPLLAVMKSFTYTNKSTEVTSLGAREITLEKEKTLPPKENPKPEPEAPKPDAPQA  
PSAPESPTTEEPKKEDAPQTPQAPSTPEKQPEVPESPNPETPDAPSTPKDEPQAPSIPEEKPVPEEPKQE  
APSAPSTPEKQPEAPESTTEEPKKEDAPAPSTPEKQPEVPESPNPETPDAPSTPKDEPQVPSIPEEQPKE  
TPAPEEPKKEDTPQTPQAPSTPKKEAPKEEVPTPPAPSVPEEQPKETPTPEVPKQEDVQPEAPKSDKVES  
DKQMPETKKPDMKQPKADDMPKEQKPKADEPKAEQPQMDKPQMEAPKDKSEAPKSDKVETDKQLPETKQP  
DMKQPKADDMPKEQKPKADEPKAEQPQMDKPQMEAPKDKSEAPKSDKVETDKMPMPETKQPDMDKQPKADKP  
EAEKAQMPRTEGMKPESKASMPKAEAPKATLPNTGEASSAIGWLGGALATLATGLYLFKNKKEE

### A0A0H3MTC5-Surfome

>tr|A0A0H3MTC5|A0A0H3MTC5\_STRS4 Putative surface-anchored protein  
OS=Streptococcus suis (strain BM407) OX=568814 GN=SSUBM407\_0244 PE=4  
SV=1  
MSKQKVVSSLLLSTVVLGGLAFYSTTTVKAESLEPDVTSVNASDATNKPVPNEEGGDFLAELEELEDDDT  
LEELNEKAEVTEPSSPEALLQPRAMMSDSETSGMEEIPMNDEPSDNTEEKVEKQQSPLIQTSNADYKS  
GKDQEKLRTSVSINLLKAEEGQIQWKVTFDTSSEWSFNVKHGGVYFILPNGLDLTKIVDNNQHDITASFPT  
DINDYRNSGQEKYRFFSSKQGLDNENGFN SQWNWSAGQANPSETVNSWKSGNRLSKIYFINQITDTELT  
YTTLAKVTEPNQQSFPLLAVMKSFTYTNKSTEVTSLGAREITLEKEKTLPPKENPKPEPEAPKPDAPQA  
PSAPESPTTEEPKKEDAPQTPQAPSTPEKQPEVPESPNPETPDAPSTPKDEPQAPSIPEEKPVPEEPKQE  
APSAPSTPEKQPEAPESTTEEPKKEDAPAPSTPEKQPEVPESPNPETPDAPSTPKDEPQVPSIPEEQPKE  
TPAPEEPKKEDTPQTPQAPSTPKKEAPKEEVPTPPAPSVPEEQPKETPTPEVPKQEDVQPEAPKSDKVES  
DKQMPETKKPDMKQPKADDMPKEQKPKADEPKAEQPQMDKPQMEAPKDKSEAPKSDKVETDKQLPETKQP  
DMKQPKADDMPKEQKPKADEPKAEQPQMDKPQMEAPKDKSEAPKSDKVETDKMPMPETKQPDMDKQPKADKP  
EAEKAQMPRTEGMKPESKASMPKAEAPKATLPNTGEASSAIGWLGGALATLATGLYLFKNKKEE

---

### A0A0H3MTL3-Exoproteome

>tr|A0A0H3MTL3|A0A0H3MTL3\_STRS4 Major pilus subunit OS=Streptococcus  
suis (strain BM407) OX=568814 GN=SSUBM407\_0414 PE=4 SV=1  
MKKLQQFFTSLSVAVLTVFAFGSTALAQTVDSGKSGAGTITVSNASQGQTYTAYKLFDATVTTDGSGISYK  
LPAGKTATNFGGDTWFEVDKGNITAKEGATVSSEAFAAWAKNFGTEVTSATANDNSLVFTHLTFGYFV  
TSSLGAVLTVDSTTPNATVIDKNTTNPTIPDSNNGGKKILSNGATTSETTAKIGDTINFQIKFNATNYV  
TKDRQTKQIVSYTIEDSPTALAIQNSVNVKVDGVDITAKISKTFDATGKMNLVITWADAAASNKTIYNS  
PAEVIITYSAVVTKDAKEGEATNSATIGYNTIDNPTTPPTPVDPKPTETTKVTTHRFTLKKTNNVGETL  
TGAEFKLYDAANNNGTEIKVVKESDGVYRVAQADEQGVVIEAGEVVIKGLKHSTTYYLEEMKAPNGYNILT  
ERQSIEVKENNTAQANIVNKKGGVLPSTGAIGTTLFYLVGSILLVALVYTISKRRMNNI

### A0A0H3MTL3-Surfome

>tr|A0A0H3MTL3|A0A0H3MTL3\_STRS4 Major pilus subunit OS=Streptococcus  
suis (strain BM407) OX=568814 GN=SSUBM407\_0414 PE=4 SV=1  
MKKLQQFFTSLSVAVLTVFAFGSTALAQTVDSGKSGAGTITVSNASQGQTYTAYKLFDATVTTDGSGISYK  
LPAGKTATNFGGDTWFEVDKGNITAKEGATVSSEAFAAWAKNFGTEVTSATANDNSLVFTHLTFGYFV  
TSSLGAVLTVDSTTPNATVIDKNTTNPTIPDSNNGGKKILSNGATTSETTAKIGDTINFQIKFNATNYV  
TKDRQTKQIVSYTIEDSPTALAIQNSVNVKVDGVDITAKISKTFDATGKMNLVITWADAAASNKTIYNS  
PAEVIITYSAVVTKDAKEGEATNSATIGYNTIDNPTTPPTPVDPKPTETTKVTTHRFTLKKTNNVGETL  
TGAEFKLYDAANNNGTEIKVVKESDGVYRVAQADEQGVVIEAGEVVIKGLKHSTTYYLEEMKAPNGYNILT  
ERQSIEVKENNTAQANIVNKKGGVLPSTGAIGTTLFYLVGSILLVALVYTISKRRMNNI

---

### A0A0H3N2T0-Exoproteome

>tr|A0A0H3N2T0|A0A0H3N2T0\_STRS4 Membrane dipeptidase OS=Streptococcus suis (strain BM407) OX=568814 GN=SSUBM407 0574 PE=3 SV=1  
MKKTFVRIATFLMLVCLFPVQLVQACSGFIIGKGLTTDGSILYGRTE DYPPPPNNGAHNKNYIVVPATAY  
AKGDMLVDESFGFTAPHLANEFKYTSTPDAARGDGSNGNFGAHGFNEKGVSMTATVTAIPNKKVLAVDPL  
VTAGGLGEAILIDYVLPVTSAREGIELIAKTIDEKGS AEGNIIVIADKNEVWYMEILSGHQYVAIKFPE  
DKY AIFANTYYLGHVDFDTENVIASAKVEEVAKQAENYMMVDGKFHIAKSYG PENYADGDRSRTYAGIK  
LLDPASSVTYEDAVYDLLRQPTDPSRRFSLQDTFALQNRNFEHLPEFRPDDEAGKVKQGDNGANDQAADA  
TYKYALGNENVIDAHVYQINSSLPSAFGGTVWLGLAQTRNTPYVPFYGIVTDTYEAFKNRSASYDTNSWY  
WTVQNIDKMAISHPELFGTSIQEKWIALEKEWIASQAALDAQYAGLSEDA AVALAPT VTEATLARS AEI F  
AQLKAVEAEMMAKIEAATTPSSSSSTEPSTSTEPSSSGTETSTSTSQSTSDSNTGGATDTSSSSRTVVPSPD  
KKVTPTNKKGKSSLPSTGEQVSLLLVALGVAGILTAIFLHRKKSSKE

### A0A0H3N2T0-Surfome

>tr|A0A0H3N2T0|A0A0H3N2T0\_STRS4 Membrane dipeptidase OS=Streptococcus suis (strain BM407) OX=568814 GN=SSUBM407 0574 PE=3 SV=1  
MKKTFVRIATFLMLVCLFPVQLVQACSGFIIGKGLTTDGSILYGRTE DYPPPPNNGAHNKNYIVVPATAY  
AKGDMLVDESFGFTAPHLANEFKYTSTPDAARGDGSNGNFGAHGFNEKGVSMTATVTAIPNKKVLAVDPL  
VTAGGLGEAILIDYVLPVTSAREGIELIAKTIDEKGS AEGNIIVIADKNEVWYMEILSGHQYVAIKFPE  
DKY AIFANTYYLGHVDFDTENVIASAKVEEVAKQAENYMMVDGKFHIAKSYG PENYADGDRSRTYAGIK  
LLDPASSVTYEDAVYDLLRQPTDPSRRFSLQDTFALQNRNFEHLPEFRPDDEAGKVKQGDNGANDQAADA  
TYKYALGNENVIDAHVYQINSSLPSAFGGTVWLGLAQTRNTPYVPFYGIVTDTYEAFKNRSASYDTNSWY  
WTVQNIDKMAISHPELFGTSIQEKWIALEKEWIASQAALDAQYAGLSEDA AVALAPT VTEATLARS AEI F  
AQLKAVEAEMMAKIEAATTPSSSSSTEPSTSTEPSSSGTETSTSTSQSTSDSNTGGATDTSSSSRTVVPSPD  
KKVTPTNKKGKSSLPSTGEQVSLLLVALGVAGILTAIFLHRKKSSKE

---

### A0A0H3MU32-Exoproteome

>tr|A0A0H3MU32|A0A0H3MU32\_STRS4 Putative surface-anchored protein OS=Streptococcus suis (strain BM407) OX=568814 GN=sao PE=4 SV=1  
MNTKKWRTSL LIPGIVLFGTVALVNNVSAQEVKNTIISAKQPDGGQATSKAVNVKIPAVVRLFGRELLEN  
EFKFELREANGEELPVLDTAQNTKEGQVRFKNLSFDKPGKYWYTISEVKDELGGIEYDSKYIVAKITVED  
RNGQLQAMIEFIDNDNVFN NFYTPAPAAASLSIKKVLEGR TLNTGEFEFVLKNEKGDEIEKVS NQADGSV  
NFSALTFTTKEGTYTYTVSEVDGGLGDI IYDKSDIKATVTVKDNNHGQLVSTV TYENS DQIFENILNPGKL  
IAPT TDSVITDNEVSK EAMTGKEKGNI EPPKEQIANEEKDNIEASEKQMP SIVNDMVVTPPEKQMTNKEND  
KVVISEKQMP SVVNENAVTPEKQMTNKENDNIETSEKQMP SVVNENAVTPEKQMTNKEKDNIETSEKQMP  
SIVNDMVVTPQEQMANKENDKV VISEKQMP SIVNDMVVTPQEQMANKENDKV VISEKQMP SIVNDMVVTP  
QEQMANKENDKV VISEKQMP SIVNDMVVTPQEQMANKENDKVETSEKQMPVNEKDNAVTPEKQMANKEKE  
NIETSKKQIPVNENNQNGTVEENSNTKPTTEKTDKQETSTFKTETAKQILPVTGEKGS LWLLTSGIIGLA  
IALFTRKRK

### A0A0H3MU32-Surfome

>tr|A0A0H3MU32|A0A0H3MU32\_STRS4 Putative surface-anchored protein OS=Streptococcus suis (strain BM407) OX=568814 GN=sao PE=4 SV=1  
MNTKKWRTSL LIPGIVLFGTVALVNNVSAQEVKNTIISAKQPDGGQATSKAVNVKIPAVVRLFGRELLEN  
EFKFELREANGEELPVLDTAQNTKEGQVRFKNLSFDKPGKYWYTISEVKDELGGIEYDSKYIVAKITVED  
RNGQLQAMIEFIDNDNVFN NFYTPAPAAASLSIKKVLEGR TLNTGEFEFVLKNEKGDEIEKVS NQADGSV  
NFSALTFTTKEGTYTYTVSEVDGGLGDI IYDKSDIKATVTVKDNNHGQLVSTV TYENS DQIFENILNPGKL  
IAPT TDSVITDNEVSK EAMTGKEKGNI EPPKEQIANEEKDNIEASEKQMP SIVNDMVVTPPEKQMTNKEND  
KVVISEKQMP SVVNENAVTPEKQMTNKENDNIETSEKQMP SVVNENAVTPEKQMTNKEKDNIETSEKQMP  
SIVNDMVVTPQEQMANKENDKV VISEKQMP SIVNDMVVTPQEQMANKENDKV VISEKQMP SIVNDMVVTP  
QEQMANKENDKV VISEKQMP SIVNDMVVTPQEQMANKENDKVETSEKQMPVNEKDNAVTPEKQMANKEKE  
NIETSKKQIPVNENNQNGTVEENSNTKPTTEKTDKQETSTFKTETAKQILPVTGEKGS LWLLTSGIIGLA  
IALFTRKRK

---

### A0A0H3MU94-Exoproteome

>tr|A0A0H3MU94|A0A0H3MU94\_STRS4 Putative surface-anchored zinc carboxypeptidase OS=Streptococcus suis (strain BM407) OX=568814 GN=SSUBM407\_0646 PE=4 SV=1  
MKLSYKKRLLNQVLLASTVLLAASLAQGTVFANTEEIPTTNETVTPLPEETPITK**TSTSEATDNLVEGK**  
ETEKQTEEIADTSPASVSTEEETTSSEPNAEETTLRTANNDNQNTTEEKPAVPTIDTITLETCTVYLSEA  
VTITESVTLPDTEKIEWILDGKPISEWKTWNLKEGDFTGDTFITVEESRQDNQLHLNIQLAALFGEDLS  
KRTPSNIRRTYRHFIDKMLLEGTSADGNLIISKTLHFRPYEAYRTHEEMLTEIEETKNNAATDRLVR**IES**  
**IGQSAEGR**DIKMAVVAKNQASIDK**YLTETTPMLMLTQPDQMLK**QLQAGTFDYRLPILINNTHADEQPGIDV  
VTSLFKEFAQKDTITFPSTDADGNPVTLLHLKVTDLLDKFIFLNFNFTENPDGDVKNLRSVLNGLDPNRDTG  
FQVNPETQAIVRQIHKWNPISVLDIHGFVSGFLIEPATPPHDPNFEYDLLADIMLEKAHEMGRAGIANSK  
YERYTIPKVHWGDGWDSDSGYTAVYAMYHGILGHTIEIPEGNQESFKAGFFAVLGGVHNMATKPDLSME  
MRLKYYSRQVNVKVEDPK**AESSELVGPDGAVVGR**VKKDQPKFFPDYYVIPMTLDKHNDMQEAFKMIIEYFNRRN  
GVVV**KELTEDVGNFR**KGDLVVDMAQAKRGFANHVLYAGSDESAWGAMYAELVVNFPDMKGFSK**AVFEEN**  
**TFSGK**LGSITWTKAPR**TTEIDFK**APYYVVANTSESQVAINQAIKSGAKVYLTDDGYIMETNQFSHLLDT  
YALYGEPLYKKPLGQELKAMKVYAPSHSYSWAGDFAILANAALAVERMGFIVNSADEADAIILESQDFD  
ASVFGKKPIIIVGGVAMQKLEELGILAGFNAEQFTDGGDYEGLMQAIIDDKDPLTSGYAMNGLFYNSNGN  
WIEGIPEGFKTLVKIADKDYYIAGWWPGHDKLANKIVAIAGNYQDQPVFIYAGNPNTKVHPVHFFRWVSN  
ALFGSQLASLEDLPAVEILVPQPEMPKNILDEAPKTTTVVHTTKSTEAKQLPQTGEKTNIAIALGSLLL  
GSIALRRKERS

### A0A0H3MU94-Surfome

>tr|A0A0H3MU94|A0A0H3MU94\_STRS4 Putative surface-anchored zinc carboxypeptidase OS=Streptococcus suis (strain BM407) OX=568814 GN=SSUBM407\_0646 PE=4 SV=1  
MKLSYKKRLLNQVLLASTVLLAASLAQGTVFANTEEIPTTNETVTPLPEETPITKTSTSEATDNLVEGK  
ETEKQTEEIADTSPASVSTEEETTSSEPNAEETTLRTANNDNQNTTEEKPAVPTIDTITLETCTVYLSEA  
VTITESVTLPDTEKIEWILDGKPISEWKTWNLKEGDFTGDTFITVEESRQDNQLHLNIQLAALFGEDLS  
**KRTPSNIRRTYRHFIDKMLLEGTSADGNLIISKTLHFRPYEAYRTHEEMLTEIEETKNNAATDRLVRIES**  
**IGQSAEGRDIKMAVVAKNQASIDKYLTETTPMLMLTQPDQMLKQLQAGTFDYRLPILINNTHADEQPGIDV**  
**VTSLFKEFAQKDTITFPSTDADGNPVTLLHLKVTDLLDKFIFLNFNFTENPDGDVKNLRSVLNGLDPNRDTG**  
**FQVNPETQAIVRQIHKWNPISVLDIHGFVSGFLIEPATPPHDPNFEYDLLADIMLEKAHEMGRAGIANSK**  
**YERYTIPKVHWGDGWDSDSGYTAVYAMYHGILGHTIEIPEGNQESFKAGFFAVLGGVHNMATKPDLSME**  
**MRLKYYSRQVNVKVEDPKAESSELVGPDGAVVGRVKKDQPKFFPDYYVIPMTLDKHNDMQEAFKMIIEYFNRRN**  
**GVVVKELTEDVGNFRKGDLVVDMAQAKRGFANHVLYAGSDESAWGAMYAELVVNFPDMKGFSKAVFEEN**  
**TFSGKLGSITWTKAPRTTEIDFKAPYYVVANTSESQVAINQAIKS**GAKVYLTDDGYIMETNQFSHLLDT  
YALYGEPLYKKPLGQELKAMKVYAPSHSYSWAGDFAILANAALAVERMGFIVNSADEADAIILESQDFD  
ASVFGKKPIIIVGGVAMQKLEELGILAGFNAEQFTDGGDYEGLMQAIIDDKDPLTSGYAMNGLFYNSNGN  
WIEGIPEGFKTLVKIADKDYYIAGWWPGHDKLANKIVAIAGNYQDQPVFIYAGNPNTKVHPVHFFRWVSN  
ALFGSQLASLEDLPAVEILVPQPEMP**KNILDEAPKTTTVVHTTKS**TEAKQLPQTGEKTNIAIALGSLLL  
GSIALRRKERS

---

### A0A0H3MUB3-Exoproteome

>tr|A0A0H3MUB3|A0A0H3MUB3\_STRS4 Putative surface-anchored protein  
OS=Streptococcus suis (strain BM407) OX=568814 GN=SSUBM407\_0661 PE=4  
SV=1  
MKKKAIVKPLLMSGIFLALLGGATLPSGAVPVVAAETSQSTTYHLTDDEKVAVR**EYIQAKMTIDMQEYRL**  
AFLEGMMEEMASGSAEAAWDEEADLKANLTAEQVVVLDELEANLIGSIAQHYHYLFETLTVAGKSGR**EE**  
**AAAIIVSKYESEDDASTPEAELAALKYAREVIVVELLNK**ESAAIDNYIAYAEATGQELAGLLESNGNSNLESI  
TSATIGYGQALATASQPK**F**FPYDFSEMDRQIAELTASLQSKVEDKSTAK**TENTGVQTSQS**SATNGSNDLQTV  
**PDQGGGQISDVATGK**GNISEAGQKKVIPNDNAKVLPKTSGKSSLPLTVLGLITIFAGWLLTNKQEEK

### A0A0H3MUB3-Surfome

>tr|A0A0H3MUB3|A0A0H3MUB3\_STRS4 Putative surface-anchored protein  
OS=Streptococcus suis (strain BM407) OX=568814 GN=SSUBM407\_0661 PE=4  
SV=1  
MKKKAIVKPLLMSGIFLALLGGATLPSGAVPVVAAETSQSTTYHLTDDEKVAV**REYIQAKMTIDMQEYRL**  
AFLEGMMEEMASGSAEAAWDEEADLKANLTAEQVVVLDELEANLIGSIAQHYHYLFETLTVAG**KSGREE**  
**AAAIIVSKYESEDDASTPEAELAALKYAREVIVVELLNK**ESAAIDNYIAYAEATGQELAGLLESNGNSNLESI  
TSATIGYGQALATASQPK**F**FPYDFSEMDRQIAELTASLQSKVEDK**STAKTENTGVQTSQS**SATNGSNDLQTV  
**PDQGGGQISDVATGKGNISEAGQKKVIPNDNAKVLPK**TSGKSSLPLTVLGLITIFAGWLLTNKQEEK

---

### A0A0H3MV17-Exoproteome

>tr|A0A0H3MV17|A0A0H3MV17\_STRS4 Putative 5'-nucleotidase  
OS=Streptococcus suis (strain BM407) OX=568814 GN=sntC PE=3 SV=1  
MPKKGLFMKKKKILLPVMSTLLLAPFVLAQQVQAAETTTAATTTNQPATTDATATVPATTDATATVPATS  
VENVATEETVVPAAEETVEAVIIHTNDVHGRILEEKNVIGDAK**AAAVIEEERAKVENTIVVDAGDAFQGL**  
**PISNSTKGEDRANIMNQVGYDAMAVGNHEFDFGMDQAIKYKETLNFPLLSANTYVNGARVFEASTIVDKT**  
**PTVVGDEFVVGVTTPETATKT**HPKNVEGVTFDTPVTEVNKVIDEVEARALADNRVYKNYIILAHLGVDS  
TTPVEWRGSTLAEALS**SKNSKLAGKRVIVIDGHSHTVEATTYGDNVTYNQTSYLN**NIGKVTLKSDKLLGE  
ASLISAADTKNVTPNAK**IAALVDEIKAKYEAENAQVVIENN**PVELNGDRSNVRVRETNLGNAVTDAIYAY  
GQTGF**SNKTS**SLAVTNGGGLRATI**AKDQPVTKGDII**AVLPFGNIVSQITVTGQQIYDMFTKSL**SSTLQVNP**  
ETGEMLLDENGMP**LFEASGGFLHISGANVFYDPTLPVEER**VLLIGILNPETGEYDALDLEKTYYLATNDF  
**LAAGGDGYTMLGGAREEGPSMDSVF**AEYLYKTADLSAYEVVNPYSR**IIPVN**SSIDTDEDGYPDFIEILLDT  
DPENPASNPETVPAENTD**SPSNQVQNTSATDKKAPVDS**SPKVGDKKTEVASPAKTTKAGVLPNTGDQMNLT  
LSLFLGLGLAGLAVAVGRRKEN

### A0A0H3MV17-Surfome

>tr|A0A0H3MV17|A0A0H3MV17\_STRS4 Putative 5'-nucleotidase  
OS=Streptococcus suis (strain BM407) OX=568814 GN=sntC PE=3 SV=1  
MPKKGLFMKKKKILLPVMSTLLLAPFVLAQQVQAAETTTAATTTNQPATTDATATVPATTDATATVPATS  
VENVATEETVVPAAEETVEAVIIHTNDVHG**RILEEKNVIGDAKAAAVIEEERAKVENTIVVDAGDAFQGL**  
**PISNSTKGEDRANIMNQVGYDAMAVGNHEFDFGMDQAIKYKETLNFPLLSANTYVNGARVFEASTIVDKT**  
**PTVVGDEFVVGVTTPETATKT**HPKNVEGVTFDTPVTEVNKVIDEVEARALADNRVYKNYIILAHLGVDS  
TTPVEWRGSTLAEALS**SKNSKLAGKRVIVIDGHSHTVEATTYGDNVTYNQTSYLN**NIGKVTLKSDKLLGE  
ASLISAADTKNVTPNAK**IAALVDEIKAKYEAENAQVVIENN**PVELNGDRSNVRVRETNLGNAVTDAIYAY  
GQTGF**SNKTS**SLAVTNGGGLRATI**AKDQPVTKGDII**AVLPFGNIVSQITVTGQQIYDMFTKSL**SSTLQVNP**  
ETGEMLLDENGMP**LFEASGGFLHISGANVFYDPTLPVEE**RVLLIGILNPETGEYDALDLEKTYYLATNDF  
**LAAGGDGYTMLGGAREEGPSMDSVF**AEYLYKTADLSAYEVVNPYSR**IIPVN**SSIDTDEDGYPDFIEILLDT  
DPENPASNPETVPAENTD**SPSNQVQNTSATDKKAPVDS**SPKVGDKKTEVASPAKTTKAGVLPNTGDQMNLT  
LSLFLGLGLAGLAVAVGRRKEN

---

### A0A0H3MV42-Exoproteome

>tr|A0A0H3MV42|A0A0H3MV42\_STRS4 Putative glucan-binding surface-anchored protein OS=Streptococcus suis (strain BM407) OX=568814  
GN=SSUBM407\_0949 PE=4 SV=1  
MTKTCNHHFLVNQEKGEKHVFRKSKKYRTLCSVALGTMVTAVVAWGGTVAHADEVVLSVDSTIQRTENPA  
TNLPEAQPNPVSEQTESLGSTGKSNGAIAVTPHETVTQTVEQAKAEGVSTVEDSPMDLGNTTSAETNQ  
QISKAEADAQNQVVAINEVTETYKADKAAYVDEKARIEQENKELSQAYEGANQTGKETNAWVDSKVNDLK  
SQYADADVTVKEQVVSSEGKTSVLDTDYGKAVETIQSTNEQAVADYLTKKTKADDIVAKNQAIQKENE  
GLAKAKADNEAIERRNQAGQAAVDAENRAGQAAVDQANQEKQQLVSDRAVEIEVITKRNQAKEVAARKEN  
EAI DAYNAKEMERYQRDLAEISKGEEGYISEALAQAALNLNNGEPQAQHGAITRNPQIISTGDAMLGGYS  
RILDSTGFFVYDSFKTGETLSFNYQNLQHARFDGKKISRVTYDITNLVSPAGTDAVKLVVPNDPTEGFIA  
YRNDGNGDWR

TDKMEFRVVAKYFLEDGSQVTFKSKEKPGVFTHSSLNHNNDIGLEYVKDSSGKFVPINGSTV  
QVTNEGLARSLGSNRASDLNLPPEWDTTSSRYAYKGAIVSTVTSNGNTYTVTFGQGDMPQNVGLSYWFALN  
TLPVARTVTPYSPKPHVTVELEPVPEPITVTPDVYTPKFTTPEKPVFTTPKPLEEVVQPSLTTLTKVTLPV  
KPIPKELPTPPQVPTIHYHAYRLTTTPEIMKEVINSDQANLHDKTVAKDSTVIYPLTVDALSPKRTQTTS  
LIFEDYLPAGYLFDKETTQKENGNYALSFDKSNFVTLTAKETLLQEVNQDLTKSYQLTAPKLYGTQND  
GATYSNSYKLLVNKGTANSYTVTSNIVTVRTPGDGETTTLITPDKNNENADGVLINDTVVALGTTNHYRL  
TWDLDQYKEDRSaketIARGFFVDDYPEEVLDVVENGTSVTTLDGQKVSGITVKTYASLNEAPKYLQDK  
FARAKITPTGAFQVFPDDNQAFYDQYVKTGTSLALLTKMTVKDSLYGQTKTYTNKGYQVDFGNGYETKE  
VTNTLVSPPEPKQNLNKDKVDINGKPMVLGTQNHYTLSWDLQYRGIKADNSQIAQGFFVDDYPEEALL  
PDEAAIQFVTS DGKTVSGITVKAYSQ LSEAPKTLQAALSKQKI QPKGAFQVFPEDPQAFYNSYVTKGEN  
ITIVTPMTVLETMINSGKSYENVAYQVDFGQAYETNTVTNFPKVPKPHKSNTNQEGISIDGKTVPNTVN  
YYKIVLDYSQYKDMVVTDDVLAKGFYMVDDYPEEALTLNPDGIQVLDKDGNRVSGISVSTYDSLSEAPKV  
VEDAMAKRQFTPKGAIQVLSSDDPKTFYETYVKTGQTLVVTLPMTVKNELTKTGGQYENTAYQIDFGLAY  
VTETVNNVNPKLDPQKDVVVDLSHKNNSLDGKEVALNQI INYRLVGAMIPSNRATDLFEYGFEDNYDEKH  
DEYNGVYRSYLMTDITLKDGSILKEGTEVTKYTLQQVDTENGLVSI SFDKSFLETVSDDSAFQADVYLHM  
KRIAAGQVENTYLHTVNGYVISSNTVVTHTPQPEEPSNPQPTPPQPPIETIEPPVPASILPNTGEQESLL  
GLIGAGILLGTAYGLKKKEEK

### A0A0H3MV42-Surfome

>tr|A0A0H3MV42|A0A0H3MV42\_STRS4 Putative glucan-binding surface-anchored protein OS=Streptococcus suis (strain BM407) OX=568814  
GN=SSUBM407\_0949 PE=4 SV=1  
MTKTCNHHFLVNQEKGEKHVFRKSKKYRTLCSVALGTMVTAVVAWGGTVAHADEVVLSVDSTIQRTENPA  
TNLPEAQPNPVSEQTESLGSTGKSNGAIAVTPHETVTQTVEQAKAEGVSTVEDSPMDLGNTTSAETNQ  
QISKAEADAQNQVVAINEVTETYKADKAAYVDEKARIEQENKELSQAYEGANQTGKETNAWVDSKVNDLK  
SQYADADVTVKEQVVSSEGKTSVLDTDYGKAVETIQSTNEQAVADYLTKKTKADDIVAKNQAIQKENE  
GLAKAKADNEAIERRNQAGQAAVDAENRAGQAAVDQANQEKQQLVSDRAVEIEVITKRNQAKEVAARKEN  
EAI DAYNAKEMERYQRDLAEISKGEEGYISEALAQAALNLNNGEPQAQHGAITRNPQIISTGDAMLGGYS  
RILDSTGFFVYDSFKTGETLSFNYQNLQHARFDGKKISRVTYDITNLVSPAGTDAVKLVVPNDPTEGFIA  
YRNDGNGDWR

YTDKMEFRVVAKYFLEDGSQVTFKSKEKPGVFTHSSLNHNNDIGLEYVKDSSGKFVPINGSTV  
QVTNEGLARSLGSNRASDLNLPPEWDTTSSRYAYKGAIVSTVTSNGNTYTVTFGQGDMPQNVGLSYWFALN  
TLPVARTVTPYSPKPHVTVELEPVPEPITVTPDVYTPKFTTPEKPVFTTPKPLEEVVQPSLTTLTKVTLPV  
KPIPKELPTPPQVPTIHYHAYRLTTTPEIMKEVINSDQANLHDKTVAKDSTVIYPLTVDALSPKRTQTTS  
LIFEDYLPAGYLFDKETTQKENGNYALSFDKSNFVTLTAKETLLQEVNQDLTKSYQLTAPKLYGTQND  
GATYSNSYKLLVNKGTANSYTVTSNIVTVRTPGDGETTTLITPDKNNENADGVLINDTVVALGTTNHYRL  
TWDLDQYKEDRSaketIARGFFVDDYPEEVLDVVENGTSVTTLDGQKVSGITVKTYASLNEAPKYLQDK  
FARAKITPTGAFQVFPDDNQAFYDQYVKTGTSLALLTKMTVKDSLYGQTKTYTNKGYQVDFGNGYETKE  
VTNTLVSPPEPKQNLNKDKVDINGKPMVLGTQNHYTLSWDLQYRGIKADNSQIAQGFFVDDYPEEALL  
PDEAAIQFVTS DGKTVSGITVKAYSQ LSEAPKTLQAALSKQKI QPKGAFQVFPEDPQAFYNSYVTKGEN  
ITIVTPMTVLETMINSGKSYENVAYQVDFGQAYETNTVTNFPKVPKPHKSNTNQEGISIDGKTVPNTVN  
YYKIVLDYSQYKDMVVTDDVLAKGFYMVDDYPEEALTLNPDGIQVLDKDGNRVSGISVSTYDSLSEAPKV  
VEDAMAKRQFTPKGAIQVLSSDDPKTFYETYVKTGQTLVVTLPMTVKNELTKTGGQYENTAYQIDFGLAY  
VTETVNNVNPKLDPQKDVVVDLSHKNNSLDGKEVALNQI INYRLVGAMIPSNRATDLFEYGFEDNYDEKH  
DEYNGVYRSYLMTDITLKDGSILKEGTEVTKYTLQQVDTENGLVSI SFDKSFLETVSDDSAFQADVYLHM  
KRIAAGQVENTYLHTVNGYVISSNTVVTHTPQPEEPSNPQPTPPQPPIETIEPPVPASILPNTGEQESLL  
GLIGAGILLGTAYGLKKKEEK

### A0A0H3MVU2-Exoproteome

>tr|A0A0H3MVU2|A0A0H3MVU2\_STRS4 Beta-N-acetylhexosaminidase  
OS=Streptococcus suis (strain BM407) OX=568814 GN=SSUBM407\_1236 PE=3  
SV=1  
MKKETSKFTKKVILGQLLICTSFLVWAGQTVAAEEVSQGEPVAINNETPPVIEAKPLVEATPSTETEPST  
PEEKQEEPQVAGKNVVEGK**KPVTNSQHQMVSELSTVPSVSIKNPDAATDGSAYGSSDDANSNTKIIAGKE**  
**TGEPDNGYSK**WDHVYVQYDFEKEVPVHTVKIHRNTYDNAVSTFKDVK**VELSTSADFSPETTEVIFKQADV**  
EETIANKGQPQVIQLPAPINARYIRIWGRGHYIQNTNSSWKGYSGVLFNEIEVLAQVEADAGTNEEPQT  
ELVNLAKLKKPYFYGKAPTNPPEAINDGKFDENYTTQESIGDKAYLQYEFRNVYTIEEIKVQLAPGEYRNF  
**RIDLDDDYNDGNNTIYK**NENFTIDKEQIITIKTPKNSKARYVRFRGTRVDDTPLRYSEIQIMGRGKSY  
DESAPEYVPPKSEYDTLVWSDEFNGDKIDESKWQIIDGMWNHAAIYNRKAVSIKKDGDKSYLSIRSTNHK  
DKKTLVEAVGHDRYDDKELPDKVTWSSGRLESKDYSFQFGRMAVRAKVNDKSGIWPPIWMLAQDETGH  
EIDVLEYLGNPQWYAWTTNHFILAKNKKSDGSAYKNYEAWSQEFHVYEVEWTPDVIKWIYIDGKVFVQTD  
RGKDRDGMHTRPMFPFILETQVGDGWVGVDYKRNMTKQDSEYLVWVRIYQKADQSKVRFDNLDDAKPND  
YVIKPPQQLGHLVTVSNGKAAHENKNNFYGGQPRYETSRLYADGDGENALVYKIANPEALHLLTTYKTL  
EDYSVYNKEAGANEGKSVRKHLINAKDGEIDFTVYSSVDGKSWNKENVTVVDNFVEATPAYARTTFDIRN  
IRKGTGKFVKIVFPTVKGISYKLEDGTEKGLQASDVQLAKVTFVATHPEAEPEKPIVDQEKLLSKVFSLD  
**AGRKYFSVNQIKEIIDLISSYGYTDMNLLLGNDGLRFLDDMNLTVGDK**VYDSEAVRKAIINGNKHYDD  
PNGTTLSQSEMDDILAYAKEKNISIPTINSPGHMDAIVEAMEELGIKSPKFSYNGKTSARTVDLKNQDA  
VAFTKALIDKYASYFAGKSKIFNIGLDEYANDATNASGWHILQTQGDYGKFIQYANDLAAIVKKHGLEPM  
AFNDGIYYNHDTSSGTFDKDIIASFWTGGWGGYDVASSKFLHEKGHKILNTNDAWYYYVIGREAEGLGWYN  
LDQGLRGTKSTRFDQVPKSENTKVPIIGSMVAVWADDPSKPYSDSIKKLLHSFTENNSDYFLAEYRDLR  
EEVGKIPTDLNSYTPESVATLKEVLNKIDWKLSRNNQAFVDGYLAEVKAAR**EALVPVTAK**GDSVKAELP  
EGKLPLITAKGKSVQAEPRPAFKGYLTSNYGPSVTPLSLVSKPSSEQSNSKQAASQKKELPNTGVVDGLG  
FSLGMIGLAFASRRRKKE

### A0A0H3MVU2-Surfome

>tr|A0A0H3MVU2|A0A0H3MVU2\_STRS4 Beta-N-acetylhexosaminidase  
OS=Streptococcus suis (strain BM407) OX=568814 GN=SSUBM407\_1236 PE=3  
SV=1  
MKKETSKFTKKVILGQLLICTSFLVWAGQTVAAEEVSQGEPVAINNETPPVIEAKPLVEATPSTETEPST  
PEEKQEEPQVAGKNVVEGKKPVTNSQHQMVSELSTVPSVSIKNPDAATDGSAYGSSDDANSNTKIIAGKE  
TGEPDNGYSKWDHVYVQYDFEKEVPVHTVKIHRNTYDNAVSTFKDVK**VELSTSADFSPETTEVIFKQADV**  
EETIANKGQPQVIQLPAPINARYIRIWGRGHYIQNTNSSWKGYSGVLFNEIEVLAQVEADAGTNEEPQT  
ELVNLAKLKKPYFYGKAPTNPPEAINDGKFDENYTTQESIGDKAYLQYEFRNVYTIEEIKVQLAPGEYRNF  
RIDLDDDYNDGNNTIYKNENFTIDKEQIITIKTPKNSKARYVRFRGTRVDDTPLRYSEIQIMGRGKSY  
DESAPEYVPPKSEYDTLVWSDEFNGDKIDESKWQIIDGMWNHAAIYNRKAVSIKKDGDKSYLSIRSTNHK  
DKKTLVEAVGHDRYDDKELPDKVTWSSGRLESKDYSFQFGRMAVRAKVNDKSGIWPPIWMLAQDETGH  
EIDVLEYLGNPQWYAWTTNHFILAKNKKSDGSAYKNYEAWSQEFHVYEVEWTPDVIKWIYIDGKVFVQTD  
RGKDRDGMHTRPMFPFILETQVGDGWVGVDYKRNMTKQDSEYLVWVRIYQKADQSKVRFDNLDDAKPND  
YVIKPPQQLGHLVTVSNGKAAHENKNNFYGGQPRYETSRLYADGDGENALVYKIANPEALHLLTTYKTL  
EDYSVYNKEAGANEGKSVRKHLINAKDGEIDFTVYSSVDGKSWNKENVTVVDNFVEATPAYARTTFDIRN  
IRKGTGKFVKIVFPTVKGISYKLEDGTEKGLQASDVQLAKVTFVATHPEAEPEKPIVDQEKLLSKVFSLD  
**AGRKYFSVNQIKEIIDLISSYGYTDMNLLLGNDGLRFLDDMNLTVGDK**VYDSEAVRKAIINGNKHYDD  
PNGTTLSQSEMDDILAYAKEKNISIPTINSPGHMDAIVEAMEELGIKSPKFSYNGKTSARTVDLKNQDA  
VAFTKALIDKYASYFAGKSKIFNIGLDEYANDATNASGWHILQTQGDYGKFIQYANDLAAIVKKHGLEPM  
AFNDGIYYNHDTSSGTFDKDIIASFWTGGWGGYDVASSKFLHEKGHKILNTNDAWYYYVIGREAEGLGWYN  
LDQGLRGTKSTRFDQVPKSENTKVPIIGSMVAVWADDPSKPYSDSIKKLLHSFTENNSDYFLAEYRDLR  
EEVGKIPTDLNSYTPESVATLKEVLNKIDWKLSRNNQAFVDGYLAEVKAAREALVPVTAKGDSVKAELP  
EGKLPLITAKGKSVQAEPRPAFKGYLTSNYGPSVTPLSLVSKPSSEQSNSKQAASQKKELPNTGVVDGLG  
FSLGMIGLAFASRRRKKE

This protein was not found in the surfome analysis

---



### A0A0H3N5E4-Exoproteome

>tr|A0A0H3N5E4|A0A0H3N5E4\_STRS4 Putative surface-anchored 5'-nucleotidase OS=Streptococcus suis (strain BM407) OX=568814 GN=SSUBM407\_1432 PE=3 SV=1  
MKKNIRLKSSI~~L~~ALVAGFSVIATQAVLADELAVQIMGVNDFHGALDMTG~~T~~ARLEGETVRNAGTAALLDAY  
MDDSQA~~E~~FEETA~~A~~ETETPAESIRVQAGDMVGASPSNSGLLQDEPTVKVFNKMDVEYGT~~L~~GNHEFDEGLDE  
YNRIMTGEAPKKGQFNEIVDNYTREAAKQEIVIANVIDKETGEIPYGWKPYA~~I~~KTIPVNDKEAKIGFIGV  
VTTEIPNLVLKKNYEQY~~T~~FLNEAETIAKYARELAEKGVNAIVVLAHVPATSKDGVAA~~G~~EAA~~D~~MI~~A~~KLNEI  
YPEHSVDLVFAGHNH~~V~~YTNGTTGKTLIVQATSQGKAYADVR~~A~~VYD~~T~~DIADFKAVPTAKIIAVAPGQKT~~P~~S  
PEIQAI~~V~~DEANTIVK~~K~~VT~~E~~QKIATASQATDISREVN~~E~~FKESAVGNLV~~T~~SAQLAIAKKSGYD~~V~~DFAMTNDG  
GIRADLK~~V~~QEDGTVTWGAAQAVQPFGNILQVVQMTGEQIYTALNQQYDEGEKYFLQMSGIKYIYTKADNP  
TEENPYKV~~V~~KAFKEDGTEIVPTET~~Y~~TLVINDFLFGGGDGFSIFKEAKLIGAINPDTEVFVEY~~L~~TDLEKAG  
QTISATIPGRKAFVEKYVEEPKAE~~E~~KEDNAGTTT~~D~~VKTPEKANDGGDSVTN~~Q~~KATEQPAPSGSMAPISNK  
KTEKASGNQTL~~P~~NTGQEALGSL~~L~~ISLGGIVSLGMAVSVRRKEGE

### A0A0H3N5E4-Surfome

>tr|A0A0H3N5E4|A0A0H3N5E4\_STRS4 Putative surface-anchored 5'-nucleotidase OS=Streptococcus suis (strain BM407) OX=568814 GN=SSUBM407\_1432 PE=3 SV=1  
MKKNIRLKSSI~~L~~ALVAGFSVIATQAVLADELAVQIMGVNDFHGALDMTGTA~~R~~LEGETVRNAGTAALLDAY  
MDDSQA~~E~~FEETA~~A~~ETETPAESIRVQAGDMVGASPSNSGLLQDEPTVKVFNKMDVEYGT~~L~~GNHEFDEGLDE  
YNRIMTGEAPKKGQFNEIVDNYTREAAKQEIVIANVIDKETGEIPYGWKPYA~~I~~KTIPVNDKEAKIGFIGV  
VTTEIPNLVLKKNYEQY~~T~~FLNEAETIAKYARELAEKGVNAIVVLAHVPATSKDGVAA~~G~~EAA~~D~~MI~~A~~KLNEI  
YPEHSVDLVFAGHNH~~V~~YTNGTTGKTLIVQATSQGKAYADVR~~A~~VYD~~T~~DIADFKAVPTAKIIAVAPGQKT~~P~~S  
PEIQAI~~V~~DEANTIVK~~K~~VT~~E~~QKIATASQATDISREVN~~E~~FKESAVGNLV~~T~~SAQLAIAKKSGYD~~V~~DFAMTNDG  
GIRADLK~~V~~QEDGTVTWGAAQAVQPFGNILQVVQMTGEQIYTALNQQYDEGEKYFLQMSGIKYIYTKADNP  
TEENPYKV~~V~~KAFKEDGTEIVPTET~~Y~~TLVINDFLFGGGDGFSIFKEAKLIGAINPDTEVFVEY~~L~~TDLEKAG  
QTISATIPGRKAFVEKYVEEPKAE~~E~~KEDNAGTTT~~D~~VKTPEKANDGGDSVTN~~Q~~KATEQPAPSGSMAPISNK  
KTEKASGNQTL~~P~~NTGQEALGSL~~L~~ISLGGIVSLGMAVSVRRKEGE

---

### A0A0H3N5P5-Exoproteome

>tr|A0A0H3N5P5|A0A0H3N5P5\_STRS4 Putative surface-anchored protein  
OS=Streptococcus suis (strain BM407) OX=568814 GN=SSUBM407\_1550 PE=4  
SV=1  
MNSKIFSLRKSKMGLVSVIAIAFLWIGTGMMNETAMAEETDATALETQLESTESSLTNTVSENAAEEVTD  
EVPSEEKKSEEMEDMEEELSFIEHLEVAPIQAGDQTISGNTTPGGYVAITIDGEAITSIENILEADDKG  
DFSyrLSKPLAHSQTVEISALPKQFWTLEADSEERKVVVRNTHPEAYEIPAKRLEKTSNGMHQVFIEPV  
FEHTSKVIGHTSVKGSVYLSINGSFVSDKTLIDPKDGRFEVTFSESLAGSKFKADDRLVLSFVSEDGQPV  
ITNTIVKPLVKEKVSSQMTVKPLSSATSVLEGTTFPLGRVHLYNADTSEFIMEAIADETGHYKIALPALQ  
SEDKYYRLTHNQEDLVSVHLDTVDGSSILLDKSVMASLATYLQDADMDEATDEDPIIVPKLHNKKDYIV  
GRTIHLNAYVRMVSSIIGKQYPPVQVDELGFFGFQIQDLQLPFEKGERIRFEIIDPVTNNIIASKEEVVG  
QYLEDEDVMDLPFQVEKVTTDHGYISGKTAPDVMIELVSTQNGEEIIGKTSTDSTGRFEFDLGSRLKNG  
ETLSFRAFDKEGEQVAWEVVTQKGNHGRINKPKDKDEKEEQPSKEITKNIEQSNLTLEQTTLPPVRQTLT  
DKKVEQNAEPSKEETVSIFFDSKKDMPTKQEKMARTVRDKGTGNVSVHDSGENTQVQSLPKTGEKTSLV  
ANIMLSIILFLFALFIGKKKITESE

### A0A0H3N5P5- Surfome

>tr|A0A0H3N5P5|A0A0H3N5P5\_STRS4 Putative surface-anchored protein  
OS=Streptococcus suis (strain BM407) OX=568814 GN=SSUBM407\_1550 PE=4  
SV=1  
MNSKIFSLRKSKMGLVSVIAIAFLWIGTGMMNETAMAEETDATALETQLESTESSLTNTVSENAAEEVTD  
EVPSEEKKSEEMEDMEEELSFIEHLEVAPIQAGDQTISGNTTPGGYVAITIDGEAITSIENILEADDKG  
DFSyrLSKPLAHSQTVEISALPKQFWTLEADSEERKVVVRNTHPEAYEIPAKRLEKTSNGMHQVFIEPV  
FEHTSKVIGHTSVKGSVYLSINGSFVSDKTLIDPKDGRFEVTFSESLAGSKFKADDRLVLSFVSEDGQPV  
ITNTIVKPLVKEKVSSQMTVKPLSSATSVLEGTTFPLGRVHLYNADTSEFIMEAIADETGHYKIALPALQ  
SEDKYYRLTHNQEDLVSVHLDTVDGSSILLDKSVMASLATYLQDADMDEATDEDPIIVPKLHNKKDYIV  
GRTIHLNAYVRMVSSIIGKQYPPVQVDELGFFGFQIQDLQLPFEKGERIRFEIIDPVTNNIIASKEEVVG  
QYLEDEDVMDLPFQVEKVTTDHGYISGKTAPDVMIELVSTQNGEEIIGKTSTDSTGRFEFDLGSRLKNG  
ETLSFRAFDKEGEQVAWEVVTQKGNHGRINKPKDKDEKEEQPSKEITKNIEQSNLTLEQTTLPPVRQTLT  
DKKVEQNAEPSKEETVSIFFDSKKDMPTKQEKMARTVRDKGTGNVSVHDSGENTQVQSLPKTGEKTSLV  
ANIMLSIILFLFALFIGKKKITESE

---

### A0A0H3MXZ4-Exoproteome

>tr|A0A0H3MXZ4|A0A0H3MXZ4\_STRS4 Mannosyl-glycoprotein endo-beta-N-acetylglucosaminidase OS=Streptococcus suis (strain BM407) OX=568814 GN=SSUBM407\_1786 PE=3 SV=1  
MTKCDFDKRQRFGIRKFTIGACSVLIGATLFGTQVSADQLENVDSLSEPAVELSSVVNEHVEKTEAEEGM  
SPISADEKAVTEELNGEASVSDSREEKLPSAPSDNPENKLEDTEEAEDKEVDSSDGLLLSDFPQVEDQG  
IRPKEIKFDNWDQVLAWEPGARPDDDLNRASVELVERFRGHVVNERANENAKVEALSNTNSKAKDHASVG  
GEEFKAYAFDYWQYIDSMVFW EGLIPSPDVIDAGHRNGVPVLGTIFYNWSSSIEDQEKFVSSMRQDPDGS  
FPVARKLVDMAKYYGFDGYFINQETTGGVLVQPLGETMRNFMLYTKEYAESIGYPITYSWYDAMTYEYGRY  
HEDGLGEYNYPFMEKEGDKVPADHFFANFNWTRAKNNYSIEVAKRIGRNPFDIFAGFELQRGGSYKTQIN  
WDALFDENGKLLKLSLGLFAPDTITSLGATGEDYHENENIFFTGYQGDPKQKPSDKNWKYGLANLIADKTA  
ITSSNFNSSFNTGHGKKWFVDGKVAKDGEWNYRSVSGILPTWRWWIEASGEKLAAAYDFDDAYNGGNSLR  
FTGDLEKDGKQEI KLYSTKIPLSETSRRLVAHKGGQGANISLALALEPDYQFANKEAWRLKLSGDWQDQ  
TFDLSSLAGKTVYGIQVVVENEAAALSDFDFRLGQLAIYDQENSPTAPKDGQVLAKRLKNAQDAEAVISFT  
GTDDADYYEVYAQVDGQWKLLTGSSNTRIYLPQLVRSQAEGRTQALKVHAVGKNGLRSEAGEFIFDWEM  
TVKDTSLPKPSAENIVLGAEVIGSSFAKKEGEGEGIEGMLNGTITSLSDKWSSHQLSGHVDIRLTQPRTVV  
RWAMDHAGAGGESVNDGLMNTKDFDLYYKNENGDWVLAKEVRGNRDHVTDIVLDKPIRAQEWRLDVLTS  
DNGTPWKAIRIYNWRMYEELDMETPNIPMTHAVARHLGNHQIQVGFKDVPANRKIALYSSPDVAVKPLAELE  
TTESGNLIFDPIRFESLPEFIYYRTLEEGKDWSNLLAIRVPQGEKVVKAMEWIAPLEKKVYRQGSPLSLA  
GAQFRVVFEGDWPAERVNTTNPAVTVRGFDPQKLGEQTLTVSYLGETLAQPLMVYVVEDIAQGEKKAVGL  
EIQQLPKVQYVVGDDLDVTNGRFAIYDDESTQSFSLTEAGVEIVGFDSRKEGRQSLGLRYAGLET SFDV  
LVSPKPIVND EYLKQKIAEIEALQTQTAYLYSSEQTQLALQTALEEA KSVVADTNRTVEQVEAAQTLL EK  
QLGELDGEKLYQADLGRNLNQLIQEVKGIDRPINSELSSLLEKTEKILGSDSIRPDEM KELLSEWTDLFE  
QSSLVTHVGT RDSMESKNLLAPEKPRMDLTIELVPRQIIITRTSTDPLGKERIVQEGADGQMMIAHLVYS  
DGRRELYSRIVADESQPKIVEVGSGLP IQQEKTLMVENS LQVEKQIRDASLQKSGLPQTGD TYQEKYVFL  
GLIGVALAGLSQLAKLRKQGE

### A0A0H3MXZ4-Surfome

>tr|A0A0H3MXZ4|A0A0H3MXZ4\_STRS4 Mannosyl-glycoprotein endo-beta-N-acetylglucosaminidase OS=Streptococcus suis (strain BM407) OX=568814 GN=SSUBM407\_1786 PE=3 SV=1  
MTKCDFDKRQRFGIRKFTIGACSVLIGATLFGTQVSADQLENVDSLSEPAVELSSVVNEHVEKTEAEEGM  
SPISADEKAVTEELNGEASVSDSREEKLPSAPSDNPENKLEDTEEAEDKEVDSSDGLLLSDFPQVEDQG  
IRPKEIKFDNWDQVLAWEPGARPDDDLNRASVELVERFRGHVVNERANENAKVEALSNTNSKAKDHASVG  
GEEFKAYAFDYWQYIDSMVFW EGLIPSPDVIDAGHRNGVPVLGTIFYNWSSSIEDQEKFVSSMRQDPDGS  
FPVARKLVDMAKYYGFDGYFINQETTGGVLVQPLGETMRNFMLYTKEYAESIGYPITYSWYDAMTYEYGRY  
HEDGLGEYNYPFMEKEGDKVPADHFFANFNWTRAKNNYSIEVAKRIGRNPFDIFAGFELQRGGSYKTQIN  
WDALFDENGKLLKLSLGLFAPDTITSLGATGEDYHENENIFFTGYQGDPKQKPSDKNWKYGLANLIADKTA  
ITSSNFNSSFNTGHGKKWFVDGKVAKDGEWNYRSVSGILPTWRWWIEASGEKLAAAYDFDDAYNGGNSLR  
FTGDLEKDGKQEI KLYSTKIPLSETSRRLVAHKGGQGANISLALALEPDYQFANKEAWRLKLSGDWQDQ  
TFDLSSLAGKTVYGIQVVVENEAAALSDFDFRLGQLAIYDQENSPTAPKDGQVLAKRLKNAQDAEAVISFT  
GTDDADYYEVYAQVDGQWKLLTGSSNTRIYLPQLVRSQAEGRTQALKVHAVGKNGLRSEAGEFIFDWEM  
TVKDTSLPKPSAENIVLGAEVIGSSFAKKEGEGEGIEGMLNGTITSLSDKWSSHQLSGHVDIRLTQPRTVV  
RWAMDHAGAGGESVNDGLMNTKDFDLYYKNENGDWVLAKEVRGNRDHVTDIVLDKPIRAQEWRLDVLTS  
DNGTPWKAIRIYNWRMYEELDMETPNIPMTHAVARHLGNHQIQVGFKDVPANRKIALYSSPDVAVKPLAELE  
TTESGNLIFDPIRFESLPEFIYYRTLEEGKDWSNLLAIRVPQGEKVVKAMEWIAPLEKKVYRQGSPLSLA  
GAQFRVVFEGDWPAERVNTTNPAVTVRGFDPQKLGEQTLTVSYLGETLAQPLMVYVVEDIAQGEKKAVGL  
EIQQLPKVQYVVGDDLDVTNGRFAIYDDESTQSFSLTEAGVEIVGFDSRKEGRQSLGLRYAGLET SFDV  
LVSPKPIVND EYLKQKIAEIEALQTQTAYLYSSEQTQLALQTALEEA KSVVADTNRTVEQVEAAQTLL EK  
QLGELDGEKLYQADLGRNLNQLIQEVKGIDRPINSELSSLLEKTEKILGSDSIRPDEM KELLSEWTDLFE  
QSSLVTHVGT RDSMESKNLLAPEKPRMDLTIELVPRQIIITRTSTDPLGKERIVQEGADGQMMIAHLVYS  
DGRRELYSRIVADESQPKIVEVGSGLP IQQEKTLMVENS LQVEKQIRDASLQKSGLPQTGD TYQEKYVFL  
GLIGVALAGLSQLAKLRKQGE

This protein was not found in the surfome analysis

### A0A0H3MXF6-Exoproteome

>tr|A0A0H3MXF6|A0A0H3MXF6\_STRS4 Surface-anchored DNA nuclease  
OS=Streptococcus suis (strain BM407) OX=568814 GN=ssnA PE=4 SV=1  
MKIRNRSIFYTVGSVAVTAGLLLSLATSPIPSVHATEVAIENYPSLAITKSEVTIQGYLIAPLNSSGTAF  
DATNKTNLALGASMDTAAADTIPIQLKEPLRSQFNLVNHPPELVGKLVRITGTSDTYMKRAGIKPATAIEI  
VDSSSTNVQPPTSSENTATKPSDLVSTPIATVRSGAQGTEYTVSGKIIISLVNGWGGNGFYLQGSAGAGIYI  
YPGAALGYQLGDTVQLTGTGLGEYKGELQLTTVSNHKAISENFNTPIETNIAQLATQAQATLVSLKNLTV  
GDIQSDSYQNSTFTVTVDSEGQTVDVRLDSRTGIKTADLLNRINKGDKINLTAILSTYNGKIQLKPFDLSH  
FEVIEKATTEAGLGKTEAVTVGRIQGASHQSPLVNQSVMLKNVVVTVTSANNFYVQDVTDPDGTCTKSDG  
INIFTDKLKTNVKVGDVLVTIAGRVEEYQGRGYAERDKTDLTITQIRATEVTVDGTAPVPSPIVLGLDRTI  
PADIIDNDGLAQFDPEQDALDFWESVEGMVVAVDDAKILGPLKNKEIYVTPATSQLPLNNVGGVNLRRPEG  
NNTNIIPLLLKNGKQIVKSGDYFIGRIAGPVTYSYTNKYVYVDDSTLPTLHEGATKPETTTTIIPNDDKLT  
IASYNIENFSANSKSTSDAKVQRIAKSFVSDLHSPDVIGLIEVQDNNGATNDGTTDASKSAERLIAAIQA  
AGGPTYTYVDIAPENNKDGGQEGGNIRVGFYLYNSKRVSLSKPIGTATQAVAWENGELNLSLGRIDPTNP  
AWAAVRKTAAEFVFKGEKVVLNHLNSKRGDNGLYGKIQPVSEFKSEKRRHILAQTIADFTKAGLAQNP  
NANIVMLGDFNDYEFKTIETILEAGGMANLVSRRHSDRFSYFYNGNNSLDNMLVSTNLFERYAFDMVH  
VNSAFMEEHGRASDHDPLLVQLDVTKAQEPTQPEPSDKQTDDSGTVNNSDDNGTTNNKPTNLSTSNQTA  
VNADDRSGATDKRQTTVTPTANNSQKILPKTGGETSFVLITIGLVFLSACLVKKQKES

### A0A0H3MXF6-Surfome

>tr|A0A0H3MXF6|A0A0H3MXF6\_STRS4 Surface-anchored DNA nuclease  
OS=Streptococcus suis (strain BM407) OX=568814 GN=ssnA PE=4 SV=1  
MKIRNRSIFYTVGSVAVTAGLLLSLATSPIPSVHATEVAIENYPSLAITKSEVTIQGYLIAPLNSSGTAF  
DATNKTNLALGASMDTAAADTIPIQLKEPLRSQFNLVNHPPELVGKLVRITGTSDTYMKRAGIKPATAIEI  
VDSSSTNVQPPTSSENTATKPSDLVSTPIATVRSGAQGTEYTVSGKIIISLVNGWGGNGFYLQGSAGAGIYI  
YPGAALGYQLGDTVQLTGTGLGEYKGELQLTTVSNHKAISENFNTPIETNIAQLATQAQATLVSLKNLTV  
GDIQSDSYQNSTFTVTVDSEGQTVDVRLDSRTGIKTADLLNRINKGDKINLTAILSTYNGKIQLKPFDLSH  
FEVIEKATTEAGLGKTEAVTVGRIQGASHQSPLVNQSVMLKNVVVTVTSANNFYVQDVTDPDGTCTKSDG  
INIFTDKLKTNVKVGDVLVTIAGRVEEYQGRGYAERDKTDLTITQIRATEVTVDGTAPVPSPIVLGLDRTI  
PADIIDNDGLAQFDPEQDALDFWESVEGMVVAVDDAKILGPLKNKEIYVTPATSQLPLNNVGGVNLRRPEG  
NNTNIIPLLLKNGKQIVKSGDYFIGRIAGPVTYSYTNKYVYVDDSTLPTLHEGATKPETTTTIIPNDDKLT  
IASYNIENFSANSKSTSDAKVQRIAKSFVSDLHSPDVIGLIEVQDNNGATNDGTTDASKSAERLIAAIQA  
AGGPTYTYVDIAPENNKDGGQEGGNIRVGFYLYNSKRVSLSKPIGTATQAVAWENGELNLSLGRIDPTNP  
AWAAVRKTAAEFVFKGEKVVLNHLNSKRGDNGLYGKIQPVSEFKSEKRRHILAQTIADFTKAGLAQNP  
NANIVMLGDFNDYEFKTIETILEAGGMANLVSRRHSDRFSYFYNGNNSLDNMLVSTNLFERYAFDMVH  
VNSAFMEEHGRASDHDPLLVQLDVTKAQEPTQPEPSDKQTDDSGTVNNSDDNGTTNNKPTNLSTSNQTA  
VNADDRSGATDKRQTTVTPTANNSQKILPKTGGETSFVLITIGLVFLSACLVKKQKES

---

### A0A0H3N6J4-Exoproteome

>tr|A0A0H3N6J4|A0A0H3N6J4\_STRS4 Putative surface-anchored serine protease OS=Streptococcus suis (strain BM407) OX=568814 GN=SSUBM407\_1843 PE=3 SV=1

MKQKWSQIENKQRFSIKKLSVGVASVSI GFFITGVPMVQADTS GEGLESTVAVATDMDSRQNSAVEKKED  
GPLSDDPVKTEQVDEPVAEEGVVEEVVDTEAGEESGLLTDQAATEIETTAGKTDESKEKEDISGKEASA  
PQTIPQESQLEPEEVTTGRYILQFSEENRNVLVDKLLKIDGVKIVHEYKEVLTGASVEVGKESLSDVKAI  
TELTSLEESRRIRPTLHTAKQLVGALKASSKYQTDGRGMVIAVIDSGLDIKHKDMRLDDGVIPIKIDITP  
STTGTYTLKVPHGYNVYVSGNDNLYDDTHEPHGMHIAAGTLAGNATDEEVASKKGVDDGIAPNAQLLVYKIF  
NDPKNYKAETEDAAYAAIEDAIGHGADVVISLVGYDYDSGLPGNAYYTI AKRAAEKGIIITAAIGNAGASS  
SDTSFDLHTNNALGAVDTATTVGVAATPAVIAVGSARNTHLVQREFMLNGQSFYGYPIGYTTLTTEGKYEF  
VDAGNGHWEEVQGLDLAGKVAVIKKDKFDLKDAVRNLKFKDVAGIIVINTDQGWNKDYYRTHQLLVDDKT  
LLSYSSIWGISLSGEDGRRLLEVANQSQGNTGLVLKPTIGMKKLIEVPTVSGFSSWGPTVNLELKPEIVA  
PGEDVYATLNDNRYGSMGTSMA SPIVAGASALLLPRIRQMTPEGMTRMDLLRIILMNTATPLVDVLDS  
SGHALENSPRQQAGLLQIDRAFETDVILHHRLLKGGVELKEIGRETEFEVTLENLGNQQRSAISAGKVL  
TSQDVPVDRIGRSGKVVKELHATEIKGSSIHLSQSIQLGPKEKRTIRLKL DAGEAKDQFAEGYIYFKSL  
TEGQSDISIPYFGFVGWDSKERIVDAPAWETSSKLLKLT SVLSSYKHNSGRYIELGREKIQDNQSPLNPD  
NIAIQNQHSDSQIGNAFVRFALLRDITNYDLDIVKEATEDAPVLRRIDTGTMLSRVRYVDYFESLSEYSK  
LRTPIELHRWDGKVYDASNDENIPAPEGQYFFRLRVKNKENGAYQYTYLPVKIDNQKPEIVAIDTNRLLSS  
HRELVVTA KDNNKVWEVRANLNGEDLLVEKVVDAGQLHYHLKEVELPLDAKNHLRVEVMDIAGNVVAVE  
KDLMAPVIQFKNLEDLMAIRSKKTVEIKANVSAQVSDVQANLDAQAVNYSLENGQLSLQIPEQSDGRHSF  
ELILKDKDGNLIYTKTLNLYVDNEKPTIDLDIEKDEEDEEVIQIGKNGRFTLKGKVSDNVSLPKDIKLYY  
SNLDIGKGERKIIDVKEDGSFEQDFFKSDFPRAIMLTAVDEKGNKLDLRINTSPESLDEEEETEVPITV  
NNWLIDPIRFNKESLGRELD SGLVDFKKQEDGTYLFTFEIEAE TEQAHSVRINGGEKRYFEDGKLTYPVT  
LIEEGNVVDISVYNEADELTYTKKYQMLVDTENPVLQLENEVLP LERQVVDSEDEDEENQYAGVLLADA  
DGHLTLTGSAKDNGIYWSLKINEDFVARGGFWRQYGNNEKAFRYELHSLKDGD TVKLDLSDSFGNAVVKK  
YKVRINDKEVSEQVPEKDLHVERSDKDQTPSIPILKSEAHI PMPKEENSLAPQTGST EIALLTGDTREDG  
VEHLGKLTKEEPLGISDERIEVSVPHREFFERSGIGETGALAADTS GKLPQTGDSLGSVFISTLLGLFG  
GAMALGNLKRKE

### A0A0H3N6J4-Surfome

>tr|A0A0H3N6J4|A0A0H3N6J4\_STRS4 Putative surface-anchored serine protease  
OS=Streptococcus suis (strain BM407) OX=568814 GN=SSUBM407\_1843 PE=3 SV=1

MKQKWSQIENKQRFSIKKLSVGVASVSI GFFITGVPMVQADTS GEGLESTVAVATDMDSRQNSAVEKKED  
GPLSDDPVKTEQVDEPVAEEGVVEEVVDTEAGEESGLLTDQAATEIETTAGKTDESKEKEDISGKEASA  
PQTIPQESQLEPEEVTTGRYILQFSEENRNVLVDKLLKIDGVKIVHEYKEVLTGASVEVGKESLSDVKAI  
TELTSLEESRRIRPTLHTAKQLVGALKASSKYQTDGRGMVIAVIDSGLDIKHKDMRLDDGVIPIKIDITP  
STTGTYTLKVPHGYNVYVSGNDNLYDDTHEPHGMHIAAGTLAGNATDEEVASKKGVDDGIAPNAQLLVYKIF  
NDPKNYKAETEDAAYAAIEDAIGHGADVVISLVGYDYDSGLPGNAYYTI AKRAAEKGIIITAAIGNAGASS  
SDTSFDLHTNNALGAVDTATTVGVAATPAVIAVGSARNTHLVQREFMLNGQSFYGYPIGYTTLTTEGKYEF  
VDAGNGHWEEVQGLDLAGKVAVIKKDKFDLKDAVRNLKFKDVAGIIVINTDQGWNKDYYRTHQLLVDDKT  
LLSYSSIWGISLSGEDGRRLLEVANQSQGNTGLVLKPTIGMKKLIEVPTVSGFSSWGPTVNLELKPEIVA  
PGEDVYATLNDNRYGSMGTSMA SPIVAGASALLLPRIRQMTPEGMTRMDLLRIILMNTATPLVDVLDS  
SGHALENSPRQQAGLLQIDRAFETDVILHHRLLKGGVELKEIGRETEFEVTLENLGNQQRSAISAGKVL  
TSQDVPVDRIGRSGKVVKELHATEIKGSSIHLSQSIQLGPKEKRTIRLKL DAGEAKDQFAEGYIYFKSL  
TEGQSDISIPYFGFVGWDSKERIVDAPAWETSSKLLKLT SVLSSYKHNSGRYIELGREKIQDNQSPLNPD  
NIAIQNQHSDSQIGNAFVRFALLRDITNYDLDIVKEATEDAPVLRRIDTGTMLSRVRYVDYFESLSEYSK  
LRTPIELHRWDGKVYDASNDENIPAPEGQYFFRLRVKNKENGAYQYTYLPVKIDNQKPEIVAIDTNRLLSS  
HRELVVTA KDNNKVWEVRANLNGEDLLVEKVVDAGQLHYHLKEVELPLDAKNHLRVEVMDIAGNVVAVE  
KDLMAPVIQFKNLEDLMAIRSKKTVEIKANVSAQVSDVQANLDAQAVNYSLENGQLSLQIPEQSDGRHSF  
ELILKDKDGNLIYTKTLNLYVDNEKPTIDLDIEKDEEDEEVIQIGKNGRFTLKGKVSDNVSLPKDIKLYY  
SNLDIGKGERKIIDVKEDGSFEQDFFKSDFPRAIMLTAVDEKGNKLDLRINTSPESLDEEEETEVPITV  
NNWLIDPIRFNKESLGRELD SGLVDFKKQEDGTYLFTFEIEAE TEQAHSVRINGGEKRYFEDGKLTYPVT  
LIEEGNVVDISVYNEADELTYTKKYQMLVDTENPVLQLENEVLP LERQVVDSEDEDEENQYAGVLLADA  
DGHLTLTGSAKDNGIYWSLKINEDFVARGGFWRQYGNNEKAFRYELHSLKDGD TVKLDLSDSFGNAVVKK  
YKVRINDKEVSEQVPEKDLHVERSDKDQTPSIPILKSEAHI PMPKEENSLAPQTGST EIALLTGDTREDG  
VEHLGKLTKEEPLGISDERIEVSVPHREFFERSGIGETGALAADTS GKLPQTGDSLGSVFISTLLGLFG  
GAMALGNLKRKE

---

## A0A0H3MYG2-Exoproteome

>tr|A0A0H3MYG2|A0A0H3MYG2\_STRS4 Putative surface-anchored  
amylopullulanase OS=Streptococcus suis (strain BM407) OX=568814  
GN=SSUBM407\_1919 PE=3 SV=1  
MKRTGMLEKKQIFGIRKLNVGVASVGIAAALFLSGAGQLVQAEEVVLPASTSSTTLSEQDGGAVEATTTA  
IEATDSMVAEATAVTETADATAPEEAPIEEGSIRLHFENVDETAPESQGLWTWGGVAEPSDGNQWPTDTA  
NFSSSQVDDYGHYVDIKKSETPGTIGYLVLKNGEKITESDQKVELLVPEQNEAWIASDYSVSSYEPLKDE  
NVLRIINYTREDDNNEGWSVWGTWGTTEASSGWPAGAVDFKLGKYGAYVDIPLSNGLDSKLGFLINQNNP  
DLAGNKTIDLAFADRKRHSQIFLRNDDDKVYTNPYFIEEKVELDTSKATPGTKNVTVGASVKAPFNYNES  
GLVSVTVTNPENAEIVKMEVDTSAGGGGLVPISTELNRVTIKATSSSTAPGTYSPLPVKVDKNGYYETKL  
DVTITERIKADGEKDWDEQVIYFMMTDRFYNGDTGNDKLVEGTASNPRGLYQGGDFKGVTAKLDYLKELG  
VDSIWLTPIVENIPQNVGSKVDGEYYAYHGYWASNFEKLNPHLGSLADFHELIDAAAEGKGINIIVDVVLN  
HAGYGTEETFAGMVRTKEEDKQGDDQLGSLSGLPDFKTEEAARNQLVAWQASWLERSTTAKGNSIYAFR  
VDTVKHVDDTTWQHFKNELVDRDPDFHLLIGETWGANYKDTKGDLGIGTMDSLDFGFKDIAKYLVNGQLK  
AAGKELEERSKVLTSAAISLGQFLGSHDEDEGFLYSLGGAKEGNLDKCLKLAASLLITAKGQPVIIYEGEEVG  
QSGQNNWPVYDNRYDFDWSKVETSDITDHYQKLLAFRANANSTLLSRGDTSTLAGNDSQGWLISKRSYQDQ  
AAYLVFSTNTENKEMALEVSGKDVVVTDAYTGKSYQAIKDGKVVVQIELPTIGQGGTMLLQTEAGDIVN  
ASVQGATEEPIEAGYFRVHFKTLPDNLSSSLGLWTWDDVEKPSSDLGAWPTGATNFSTAKQDDYGYLDI  
KMKDETASKISLLINNTSGDNITGDKTIERISTKMNEAWFDENYQLSLYQPLKEGYIRINYFRDGNIDQ  
KGLWIWGDVDTLTLGDWPNGIDFENQGKYGAYIDVKLTDLPSISIGFLLLDESKSGDDVKIQKDYFSKDL  
KNQTQIFLKDDDATIYTNPYFVNNVRATGVSHVSLTALEAAFTTLEGADKDSILEKLSVTDKNGQTVAVT  
DLVLDLTSNKVRVLGDFNQENAGYTLKYGNDSTTTTMSWQLKDELYAYDGELGARVRQAGSVVDMTLWSP  
SADSVAVVLYDKDDQSKVVGKLAMTKGDKGQWDELNSSQSGLGIADYRGYYYHYEITRGDQSVLVLDPYA  
KSLAEWNSDLADTPSYRIAKAAIVDPAEVGPSDLNYATIPNFNQREDAIIEAHVRDFTADPAISDELT  
AQGFTFAAFAERLSYLKELGVTHIQLLPVMSYFVNELKNAERMSEYASSNSNYNWGVDPSYFAFTGMY  
STDPTDPMKRIEEFKNLVNEIHKQGMGVLLDVYNHTSKTFLFEDLEPNYYHFMEADGTAKSSFGGGRLG  
TTHYMSRRVLVDSIKYLVDEFKVDGFRFDMMGDHDAAEIELAFTEAQKLNPNIIMLGEGRWRTFTGDANQP  
VQPADQDWMSSTDTVAVFSDEIRNTLKSGYPNEGQPAFITGGAKSVESVFNNIKAQPGNFLADDPGDVIQ  
YIAAHDNLTLFDIIAQSIKKDPSVTENYTEIHQRQRLGNLLVLTAAQGTPIHSGQEYGRTRKQFRHPDYKE  
PVTEDEKVPNKAHLLTNADGTPFDYPYIYHDSYDSSDAVNKFDTWKATDEALYPENTRTQAFKGLIALRK  
STDAFRLGTKEEVEQKVSLISIPGQNGIAKNDVVIAYQTIASNGDRYAVFVNADSKERSFVLSDIYKELL  
KGQVLVDGERAGVEALSDLVGVELTDSSVVLAPLATVIRLPYITLALPDTAPTAEKPSLDFTTKERTE  
ETVLPPIAEVRYDATLAKGQSYVLQEGKAGKRVLVYQDVLVDGKVVATNLLSETVVDGEARIVVKGSMEA  
KDVVEKPSLSTPTAQASGQATSGASKASLPITGDRQSDLALLGLGLAGLGLTVAAQGRKKSEE

## A0A0H3MYG2-Surfome

>tr|A0A0H3MYG2|A0A0H3MYG2\_STRS4 Putative surface-anchored  
amylopullulanase OS=Streptococcus suis (strain BM407) OX=568814  
GN=SSUBM407\_1919 PE=3 SV=1  
MKRTGMLEKKQIFGIRKLNVGVASVGIAAALFLSGAGQLVQAEEVVLPASTSSTTLSEQDGGAVEATTTA  
IEATDSMVAEATAVTETADATAPEEAPIEEGSIRLHFENVDETAPESQGLWTWGGVAEPSDGNQWPTDTA  
NFSSSQVDDYGHYVDIKKSETPGTIGYLVLKNGEKITESDQKVELLVPEQNEAWIASDYSVSSYEPLKDE  
NVLRIINYTREDDNNEGWSVWGTWGTTEASSGWPAGAVDFKLGKYGAYVDIPLSNGLDSKLGFLINQNNP  
DLAGNKTIDLAFADRKRHSQIFLRNDDDKVYTNPYFIEEKVELDTSKATPGTKNVTVGASVKAPFNYNES  
GLVSVTVTNPENAEIVKMEVDTSAGGGGLVPISTELNRVTIKATSSSTAPGTYSPLPVKVDKNGYYETKL  
DVTITERIKADGEKDWDEQVIYFMMTDRFYNGDTGNDKLVEGTASNPRGLYQGGDFKGVTAKLDYLKELG  
VDSIWLTPIVENIPQNVGSKVDGEYYAYHGYWASNFEKLNPHLGSLADFHELIDAAAEGKGINIIVDVVLN  
HAGYGTEETFAGMVRTKEEDKQGDDQLGSLSGLPDFKTEEAARNQLVAWQASWLERSTTAKGNSIYAFR  
VDTVKHVDDTTWQHFKNELVDRDPDFHLLIGETWGANYKDTKGDLGIGTMDSLDFGFKDIAKYLVNGQLK  
AAGKELEERSKVLTSAAISLGQFLGSHDEDEGFLYSLGGAKEGNLDKCLKLAASLLITAKGQPVIIYEGEEVG  
QSGQNNWPVYDNRYDFDWSKVETSDITDHYQKLLAFRANANSTLLSRGDTSTLAGNDSQGWLISKRSYQDQ  
AAYLVFSTNTENKEMALEVSGKDVVVTDAYTGKSYQAIKDGKVVVQIELPTIGQGGTMLLQTEAGDIVN  
ASVQGATEEPIEAGYFRVHFKTLPDNLSSSLGLWTWDDVEKPSSDLGAWPTGATNFSTAKQDDYGYLDI  
KMKDETASKISLLINNTSGDNITGDKTIERISTKMNEAWFDENYQLSLYQPLKEGYIRINYFRDGNIDQ  
KGLWIWGDVDTLTLGDWPNGIDFENQGKYGAYIDVKLTDLPSISIGFLLLDESKSGDDVKIQKDYFSKDL  
KNQTQIFLKDDDATIYTNPYFVNNVRATGVSHVSLTALEAAFTTLEGADKDSILEKLSVTDKNGQTVAVT

DLVLDLTSNKVRLVLDGDFNQENAGYTLKYGNDSTTTMSWQLKDELYAYDGELGARVRQAGSVVDMTLWSP  
SADSVAVVLYDKDDQSKVVGKLAMTKGDKGQWDLLENSQSGLGIADYRGYYYHYEITRGDQSVLVLDPYA  
KSLAEWNSDLADTDPSYRIAKAAIVDPAEVGPSDLNYATIPNFNQREDAIIEAHVRDFTADPAISDELT  
AQFGTFAAFAERLSYLKELGVTHIQLLPVMSYYFVNELKNAERMSEYASSNSNYNWGYDPQSYFAFTGMY  
STDPTDPMKRIEEFKNLVNEIHKQGMGVIDLVVYNHTSKTFLFEDLEPNYYHFMEADGTAKSFGGGRLG  
TTHYMSRRVLVDSIKYLVDEFKVDGFRFDMGDHDAEAEIELAFTEAQKLNPNIIMLGEGWRTFTGDANQP  
VQPADQDWMSSDPTVAVFSDEIRNTLKSGYPNEGQPAFITGGAKSVESVFNNIKAQPGNFLADDPGDVIQ  
YIAAHDNLTFLFDIIAQSIKKDPSVTENYTEIHQRQRLGNLLVLTAAQGPFIHSGQEYGRTKQFRHPDYKE  
PVTEDKVPNKAHLTNADGTPFDYPYIHDSDSSDAVNKFDWTKATDEALYPENTRTQAFKGLIALRK  
STDAFRLGTKEEVEQKVSLSIPGQNGIAKNDVVIAYQTIASNGDRYAVFVNADSKERSFVLSDIYKELI  
KGQVLVDGERAGVEALSDLVGVELTDSSVVLAPLTATVIRLPYITTTALPDTAPTAEKPSLDFTTKERTE  
ETVLPPIAEVRYDATLAKGQSYVLQEGKAGKRVLVYQDVLVDGKVVATNLLSETVVDGEARIIVVKGSMEA  
KDVVEKPSLSTPTAQASGQATSGASKASLPITGDRQSDLALLGLGLAGLGLTVAAQGRKKSEE

---

### A0A0H3MXR4-Exoproteome

>tr|A0A0H3MXR4|A0A0H3MXR4\_STRS4 2',3'-cyclic-nucleotide 2'-  
phosphodiesterase/3'-nucleotidase OS=Streptococcus suis (strain BM407)  
OX=568814 GN=SSUBM407\_1949 PE=3 SV=1  
MNFRRFSKCAVALTLALLAASNPKLAQAEEILNTTPASSTEASQAVPVESDTTEEADNTESPVPATTEAEN  
PSSSETAETS DPTSETTDTTTSEAR TVTPAATETSQPV EGQTV DVRI LATTDLHTNLVNYDYYQDKPVET  
LGLAKTAVLIEEAKKENPNVVLVDNGDTIQGTPLGNYKSIVDPIEEGEQHMPYAALETLGFDVGT LGNHE  
FNYGLAYLEKVIR TANMPLVNANVLDPTTKDFLYTPYTIVKKKTFTDTEGKKVTLNVGVTGIVPPQILNWD  
KAYLEGKVIVRDAVEAVRDIIP TMRENGADIVLVLSHSGIGDDQYEVGEENVGYQIASLSGVD AVITGHS  
HAEFPGTAEKPSFYAKYSGVDDTNGKINGTPVTMAGKYGDHLGVIDLNLVFKD GKWTTTSSKAAIRKIDT  
KSSVADGRIIDLAKEAHNETIKYVRQQVGETTAPINSFFALVQDDPSVQIVNNAQIWIYAKQQLAGTSEAN  
LPILSAAAPFKAGTRGDASAYTDIPAGPIAIK NVADLYLYDNVVAILKVNGAQLKEWLEMSAGQFNQVDL  
SSTEPQNLVNTDFRTYNFDVIDGVTYQYDITQPNKYDRDGKIVNETASRVRNLQYNGQDVTADQEFIVVT  
NNYRANGTFPGVREASINRLNLENRQAIINYIIAEKVINPTADNNWTF TDSIKGLDLRFLTADRAKSLV  
TDQECIVYLQASTASEGFGEFKFVYTESKV VTPDEQQSDQGNTGQDIVLES GQRITLPAVNPPAPAPQHK  
LASPHSQASTKTLPATGEATSMLSLLGLTLIGFVGAWTKKKEH

### A0A0H3MXR4-Surfome

>tr|A0A0H3MXR4|A0A0H3MXR4\_STRS4 2',3'-cyclic-nucleotide 2'-  
phosphodiesterase/3'-nucleotidase OS=Streptococcus suis (strain BM407)  
OX=568814 GN=SSUBM407\_1949 PE=3 SV=1  
MNFRRFSKCAVALTLALLAASNPKLAQAEEILNTTPASSTEASQAVPVESDTTEEADNTESPVPATTEAEN  
PSSSETAETS DPTSETTDTTTSEAR TVTPAATETSQPV EGQTV DVRI LATTDLHTNLVNYDYYQDKPVET  
LGLAKTAVLIEEAKKENPNVVLVDNGDTIQGTPLGNYKSIVDPIEEGEQHMPYAALETLGFDVGT LGNHE  
FNYGLAYLEKVIR TANMPLVNANVLDPTTKDFLYTPYTIVKKKTFTDTEGKKVTLNVGVTGIVPPQILNWD  
KAYLEGKVIVRDAVEAVRDIIP TMRENGADIVLVLSHSGIGDDQYEVGEENVGYQIASLSGVD AVITGHS  
HAEFPGTAEKPSFYAKYSGVDDTNGKINGTPVTMAGKYGDHLGVIDLNLVFKD GKWTTTSSKAAIRKIDT  
KSSVADGRIIDLAKEAHNETIKYVRQQVGETTAPINSFFALVQDDPSVQIVNNAQIWIYAKQQLAGTSEAN  
LPILSAAAPFKAGTRGDASAYTDIPAGPIAIK NVADLYLYDNVVAILKVNGAQLKEWLEMSAGQFNQVDL  
SSTEPQNLVNTDFRTYNFDVIDGVTYQYDITQPNKYDRDGKIVNETASRVRNLQYNGQDVTADQEFIVVT  
NNYRANGTFPGVREASINRLNLENRQAIINYIIAEKVINPTADNNWTF TDSIKGLDLRFLTADRAKSLV  
TDQECIVYLQASTASEGFGEFKFVYTESKV VTPDEQQSDQGNTGQDIVLES GQRITLPAVNPPAPAPQHK  
LASPHSQASTKTLPATGEATSMLSLLGLTLIGFVGAWTKKKEH

---

## A0A0H3MV01-Exoproteome

>tr|A0A0H3MV01|A0A0H3MV01\_STRS4 Putative IgA-specific zinc metalloproteinase OS=Streptococcus suis (strain BM407) OX=568814 GN=zmpC PE=4 SV=1

MKRSLGEKRQRFGRKMSVGLVSAAVTSLFFVSSVATAPTASAQSIYNSYVTEQELTDGEKELIIRDLPGLAQETDVNYLIYRPATGTTSTPSTSTSQVLPNTGVSVESELLVAGGVSLLLAVRFGKKGKKELAGVILLTATGASFFGPTSSALTSQILARYNHAIEISAGQALPAPAEIDGYVYVGYLKDSKAIEQTTSEEEKTAEFFASEGIRTTETIVNKTAEIPFEIQTVENPQLSAGTERVVQEGQDGERIVTIKQVHSGQIIISEEEISSTVTKTAVPKIVEVGTQATDDIVTEVPDTEPSYENSTNSLTEETVTHTEVFADFVQEIYDVNLAEGSREVEQKGQDGVRTIETRNYYADGVLIKSEQVSDVVTKEPVTETVVRVGTKTDDVIGSETIVTTEELPFETTVTETEELVVGEEKFITEGKVGSKVETTTTYQTINGVSQPNPTVTEKVLLEPTTKVLEKGTKPIEGTEIETNQVEITFEYVYVDDPTLLEGGTKVVVTAGVNGSKTVTTTYQTIKGVVQENSTVTEETITKQPVKQVIARGTKVEKVPQVITDLDLVENDDAKSATISYKLTDETANFQRAVALLYDNTGALVQEQTITDPNGQLTLENLDFYTDYTVKTKI FYTMAEQEQSSEQEAILES MRKFDLVYKKIEIKDIDAVTVYRRKNGSYIGQEFLEELPASTDELFIKVTSDRFKEVYLPVSSIEETTLNGKAVFKLVSSSFDELVDQDKDAQYVANREFYIPKMATDANTYTSFKALLDAMKANPSGTFKLGAHLDASEVPVGDVASVYTNFSGTLDGLNDGYAFSISNLKAPLFFNLGGKVQNLDIKNASLNTSSKNPLATIAINANGATITNVAVEASIKGPQNVSGLVHSATNTTIKGVSFKGSIEVTGTNASLTGGIILGNGTMAVGNNAKVDATITLPGTENQVAGGIVGRITMLVYDVPGSVYNSYAAGSIVTTESAAIVGGIAGANQVTGAYAPHSGNVNNVSDMTGTSIIGQPANPTGKIKGDFTTTSDSLTNVTVITDEEAQAKVEAMAIQATIDDSVPLNPNHYSVDYLTLDKAQADHETAYYNMEKILPFYNKELLVYYGNKIATDDKLNKVRLLDVVPMKDNAVVDVYAEKANINKIMLHYADGTVDYKTVSYLEDYFKNNHVVEYITISGTDLIYTPESFLNDRSALVNDLVSSLSVVLDSDAMKAVINYPTTLNADTQTGTAKDFYFGESYDQVMTNLESNVRKILVASLNGQGQASEDYIKDKIINNKAAPVFLGLTYLNRWYDINFGEMNTKDLTIFEPDFFGNDAAALDMLAIGNGGYDVLRAHNNVTTFASIIIGKQNNQTKLFDMLEDYRQLFLPEMTNNEWFKQTTKAYVVEGKSLIPEVAAKQETTTDTYSKYNVGAYSKIVNDTVSNPTWKYNHMLPLTLPLQENIFITNMNTIAIGSYEHYVDDVSTVENRDKVRQMVDLAAERQDNDADFVYKILDETNRDKLFRSVLNNEGYVMYGKDGTYSYRNLTAADVDAIQDFYGPINKWYREHPSIKTAFADGSETYYITYDMLTDYGTALYTHEMVHNQDGDIIYLGKGRRIGQGMEVYAQGLLQNVFNVT EMNLGFNAVYNSDDANRVHVGDPVARENSEADFNEYHNQFDVLYLLDYLEGTNILAQSDANKKAWLRKIENYYVQNNGVDTTHAGNSARALTDAEVASLKSFNLDLIDQSIIVQRQYVNNPTNTSKKWDNRNSYVSPMFAAFNFSALSNSNGSPGDIMFRRMAFELIAAKGYTDGFVPYASGQLSDLAMEKGSIIYDTWNKKNKTGLITDDHVL EYVVFQGGYTSWTEFFKAMFTERLEKAATGQLKPFTMQYELGVADSTKEVTITTSFEQLQNLMEAMEADI QANSLNLNNSRVHALKVKVYQALMNSTNDFRTSIFN

## A0A0H3MV01-Surfome

>tr|A0A0H3MV01|A0A0H3MV01\_STRS4 Putative IgA-specific zinc metalloproteinase OS=Streptococcus suis (strain BM407) OX=568814 GN=zmpC PE=4 SV=1

MKRSLGEKRQRFGRKMSVGLVSAAVTSLFFVSSVATAPTASAQSIYNSYVTEQELTDGEKELIIRDLPGLAQETDVNYLIYRPATGTTSTPSTSTSQVLPNTGVSVESELLVAGGVSLLLAVRFGKKGKKELAGVILLTATGASFFGPTSSALTSQILARYNHAIEISAGQALPAPAEIDGYVYVGYLKDSKAIEQTTSEEEKTAEFFASEGIRTTETIVNKTAEIPFEIQTVENPQLSAGTERVVQEGQDGERIVTIKQVHSGQIIISEEEISSTVTKTAVPKIVEVGTQATDDIVTEVPDTEPSYENSTNSLTEETVTHTEVFADFVQEIYDVNLAEGSREVEQKGQDGVRTIETRNYYADGVLIKSEQVSDVVTKEPVTETVVRVGTKTDDVIGSETIVTTEELPFETTVTETEELVVGEEKFITEGKVGSKVETTTTYQTINGVSQPNPTVTEKVLLEPTTKVLEKGTKPIEGTEIETNQVEITFEYVYVDDPTLLEGGTKVVVTAGVNGSKTVTTTYQTIKGVVQENSTVTEETITKQPVKQVIARGTKVEKVPQVITDLDLVENDDAKSATISYKLTDETANFQRAVALLYDNTGALVQEQTITDPNGQLTLENLDFYTDYTVKTKI FYTMAEQEQSSEQEAILES MRKFDLVYKKIEIKDIDAVTVYRRKNGSYIGQEFLEELPASTDELFIKVTSDRFKEVYLPVSSIEETTLNGKAVFKLVSSSFDELVDQDKDAQYVANREFYIPKMATDANTYTSFKALLDAMKANPSGTFKLGAHLDASEVPVGDVASVYTNFSGTLDGLNDGYAFSISNLKAPLFFNLGGKVQNLDIKNASLNTSSKNPLATIAINANGATITNVAVEASIKGPQNVSGLVHSATNTTIKGVSFKGSIEVTGTNASLTGGIILGNGTMAVGNNAKVDATITLPGTENQVAGGIVGRITMLVYDVPGSVYNSYAAGSIVTTESAAIVGGIAGANQVTGAYAPHSGNVNNVSDMTGTKSIIIGQPANPTGKIKGDFTTTSDSLTNVTVITDEEAQAKVEAMAIQATIDDSVPLNPNHYSVDYLTLDKAQADHETAYYNMEKILPFYNKELLVYYGNKIATDDKLNKVRLLDVVPMKDNAVVDVYAEKANINKIMLHYADGTVDYKTVSYLEDYFKNNHVVEYITISGTDLIYTPESFLNDRSALVNDLVSSLSVVLDSDAMKAVINYPTTLNADTQTGTAKDFYFGESYDQVMTNLESNVRKILVASLNGQGQASE



DYIKEKIINNKAAFVLGLTYLNRWYDINFGEMNTKDLTIFEPDFFGNDAASALDMILAIGNGGYDVLRAH  
NNVTTFASIIIGKQNNQTKLFDMLEDYRQLFLPEMTNNEWFKQTTKAYVVEGKS LIPEVAAKQETTDITYSK  
YNVGAYSKIIVNDTVSNPTWKYNHMLLP LLTLPQENIFIITNMNTIAIGSYEHYVDDYSTVENRDKV RQMV  
DLAAERQRDNADFWYKILDETNRDKLFRSVLNNEGYVMYGKDGTKSYRNLTA DVDAIQDFYGPINKWYRE  
HPSIKTAFADGSETYYITYDMLTDYGTALYTHEMVHNQDGDIIYLKGYGRRIGQGMEVYAQGLLQNVFNVT  
EMNLGFNAVYNSDDANRVHVGD PVARENSEADFNEYHNQFDVLYLLDYLEG TNILAQSDANKKAWLRKI  
ENYYVQNNGV DTHAGNSARAL TDAEVASLKSFN DLIDQSIIVQRQYVNNPTNTSKK WDRNSYVSVPMFAA  
NFSALSNSNGSPGDIMFRFMAFELIAAKGYTDGFVPYASGQLSDLAMEKGSIIYDTWNKKNTGLITDDHV  
LEYVFGQYTSWTEFKKAMF TERLEKAATGQLKPFTMQYELGVADSTKEVTITSFEQLQNL MKEAMEADI  
QANSLN LNNSRV HALKV K VYQALMNSTNDFRTSIFN

---
